1 **A global barley panel revealing genomic signatures of breeding in modern**  
2 **cultivars**

3 Camilla Beate Hill<sup>1</sup>, Tefera Tolera Angessa<sup>1</sup>, Xiao-Qi Zhang<sup>1</sup>, Kefei Chen<sup>2,3</sup>, Gaofeng  
4 Zhou<sup>1,2</sup>, Cong Tan<sup>1</sup>, Penghao Wang<sup>1</sup>, Sharon Westcott<sup>2</sup>, Chengdao Li<sup>\*1,2</sup>

5

6 <sup>1</sup>Western Barley Genetics Alliance, Agricultural Sciences, College of Science, Health,  
7 Engineering and Education, Murdoch University, Murdoch, WA

8 <sup>2</sup>Agriculture and Food, Department of Primary Industries and Regional Development, South  
9 Perth, WA, Australia

10 <sup>3</sup> Statistics for the Australian Grains Industry (SAGI) West, Faculty of Science and  
11 Engineering, Curtin University, Bentley, WA, Australia

12

13 \* Corresponding author

14 Email: [C.Li@murdoch.edu.au](mailto:C.Li@murdoch.edu.au)

15

16

## 17 **Abstract**

18 The future of plant cultivar improvement lies in the evaluation of genetic resources from  
19 currently available germplasm. Recent efforts in plant breeding have been aimed at  
20 developing new and improved varieties from poorly adapted crops to suit local environments.  
21 However, the impact of these breeding efforts is poorly understood. Here, we assess the  
22 contributions of both historical and recent breeding efforts to local adaptation and crop  
23 improvement in a global barley panel by analysing the distribution of genetic variants with  
24 respect to geographic region or historical breeding category. By tracing the impact breeding  
25 had on the genetic diversity of barley released in Australia, where the history of barley  
26 production is relatively young, we identify 69 candidate regions within 922 genes that were  
27 under selection pressure. We also show that modern Australian barley varieties exhibit 12%  
28 higher genetic diversity than historical cultivars. Finally, field-trialling and phenotyping for  
29 agriculturally relevant traits across a diverse range of Australian environments suggests that  
30 genomic regions under strong breeding selection and their candidate genes are closely  
31 associated with key agronomic traits. In conclusion, our combined dataset and germplasm  
32 collection provide a rich source of genetic diversity that can be applied to understanding and  
33 improving environmental adaptation and enhanced yields.

34

## 35 **Author summary**

36 Today's gene pool of crop genetic diversity has been shaped during domestication and more  
37 recently by breeding. Genetic diversity is vital for crop species to be able to adapt to  
38 changing environments. There is concern that recent breeding efforts have eroded the genetic  
39 diversity of many domesticated crops including barley. The present study assembled a global  
40 panel of barley genotypes with a focus on historical and modern Australian varieties.  
41 Genome-wide data was used to detect genes that are thought to have been under selection

42 during crop breeding in Australian barley. The results demonstrate that despite being more  
43 extensively bred, modern Australian barley varieties exhibit higher genetic diversity than  
44 historical cultivars, countering the common perception that intensive breeding leads to  
45 genetic erosion of adaptive diversity in modern cultivars. In addition, some loci (particularly  
46 those related to phenology) were subject to selection during the introduction of other barley  
47 varieties to Australia – these genes might continue to be important targets in breeding efforts  
48 in the face of changing climatic conditions.

49

## 50 **Introduction**

51 The diversity of the existing genetic pool for commercially important plant species has been  
52 shaped during plant domestication, human migration, varietal selection processes and, more  
53 recently, breeding. However, there is concern that breeding efforts have eroded genetic  
54 variation, thereby resulting in a narrow range of genotypes in the current gene pools of  
55 domesticated crops [1,2]. Although regionally adapted landraces and wild relatives represent  
56 the most diverse germplasm reservoirs, the introgression of desirable alleles into elite  
57 germplasm used by breeders—whilst minimising the introduction of other genes from the  
58 wild germplasm that might reduce the agronomic fitness of the elite cultivar —has been  
59 challenging and time consuming [3]. As a result of these challenges and the often limited  
60 availability of high-density markers and detailed information for key adaptive traits, the high  
61 degree of genetic diversity in wild crop relatives has been poorly exploited.

62 Changes in global climate and short-term variations in growing environments pose  
63 unprecedented challenges to maintain and further enhance crop yields. Among other effects,  
64 climate change substantially alters phenological cycles, thereby posing a significant challenge  
65 to growers, who must modify crop management practices such as sowing dates in order to

66 achieve optimal flowering times [4]. Conservation and maintenance of current crop genetic  
67 diversity for future breeding of new varieties is particularly important to help mitigate future  
68 adverse impacts of climate change on crop production.

69 While climate change threatens the supply of agricultural products, global demand is  
70 increasing for resource-intensive foods including meat and dairy, and alcoholic beverages  
71 including beer [5,6]. Barley (*Hordeum vulgare* L.) is a globally important and versatile crop  
72 used for both livestock feed and brewing malts. Despite of its large and repeat-rich genome  
73 (~5.1 Gb) distributed over seven chromosomes, it is a widely utilized diploid cereal model for  
74 genetic studies in the *Triticeae*, a botanical tribe which includes polyploid bread wheat and  
75 rye. Since the barley reference genome became publicly available [7], several genetic studies  
76 have explored the origin, domestication, and geographic spread of modern barley [8,9], and  
77 showed that the Fertile Crescent is the main centre of domestication and genetic diversity.  
78 Population genetic studies have examined a variety of aspects of barley genetic variation on a  
79 global scale, and have identified a striking degree of variability in traits related to flowering  
80 time, grain yield, and tolerance to abiotic and biotic factors [10-14]. This suggests that current  
81 barley germplasm resources might be harnessed to meet future challenges imposed by climate  
82 change.

83 Although it was only in the late 18<sup>th</sup> century that barley was first introduced to Australia [15],  
84 it is currently one of the world's largest barley producers (<http://faostat.fao.org>). The first  
85 introduced cultivars were poorly adapted, late-maturing, European barleys, and were  
86 susceptible to the hot, dry conditions typical of Australia. It was not until the 1960s that first  
87 Australian breeding programmes were established that specifically targeted different barley-  
88 producing regions in Western Australia, South Australia, Victoria, New South Wales,  
89 Queensland and Tasmania. Only then new breeding material from North Africa and North

90 America was introduced to improve disease resistance against powdery mildew and cereal  
91 cyst nematodes as well as phenological adaptation of Australian barley varieties, which was  
92 further aided by the development of molecular marker technologies in the 1980s. However,  
93 the genetic impact of these breeding efforts and the extent of genetic diversity within current  
94 cultivated barley germplasm reservoirs is poorly understood.

95 In this study, we assessed the contributions of both historical and recent breeding efforts  
96 towards local adaptation and crop improvement in a global barley panel, using Australian  
97 barley as a model for the profound impact that breeding efforts can have on developing a  
98 previously poorly adapted crop suitable to local environments. In order to accomplish this,  
99 we analysed the distribution of genetic variants in terms of geographic region and historical  
100 breeding category and determined the genomic regions under selection and underlying  
101 candidate genes that may have been shaped by selective breeding. Associations identified  
102 between both known and novel genes and agronomic traits demonstrate the value of our  
103 global barley panel for both fundamental and applied studies. Lastly, both our selective  
104 sweep analyses and our genome-wide association studies (GWASs) highlight targets for  
105 future gene and functional allele discovery.

106

## 107 **Results**

108

### 109 **Barley genomic diversity**

110 To examine the origins and patterns of genetic diversity within the currently available barley  
111 cultivar gene pool, we assembled a global panel of 632 genotypes to represent barley  
112 genotypes from major global barley breeding programmes, including both historical cultivars  
113 and modern cultivars from 43 countries (S1 Fig, S1 File). The panel of 632 genotypes

114 geographically diverse barley cultivars was genotyped using target capture [10,11], low-  
115 coverage whole-genome sequencing (WGS), and genotyping-by-sequencing (GBS) by  
116 Diversity Arrays Technology (DArTseq). In total, 15,328 single-nucleotide polymorphisms  
117 (SNPs) and insertions and deletions (InDels) were detected via low-coverage WGS, 4,260  
118 SNPs via target-enrichment sequencing, and 18,551 SNPs via DArTseq were distributed  
119 across 5,171 barley genes. The mapping of genetic markers from all 632 genotypes onto the  
120 current barley reference genome sequence [7] (IBSC v2) revealed 38,139 high-confidence  
121 genetic variants. A total of 33,486 filtered genetic markers (32,645 SNPs and 841 InDels)  
122 with a minor allele frequency (MAF) > 0.01 were used in the present study (S1 Table). As  
123 expected for target capture and DArTseq analyses (which focused on actively transcribed  
124 genes), the distribution of genetic variants across the seven chromosomes exhibited a visible  
125 gradient across chromosome compartments, from distal regions with relatively high gene  
126 density to pericentromeric regions with fewer genes (S2 and S3 Figs).

127 For a more detailed analysis of the genomic changes that have occurred during the history of  
128 Australian barley breeding, Australian genotypes were separated into four historical  
129 subgroups based on release date: Category A (historically relevant cultivars used in 20<sup>th</sup>  
130 century breeding programmes in Australia, released between 1903 and 1998), Category B  
131 (modern cultivars with specific regional adaptations that were released between 1999 and  
132 2005 as a result of focused barley breeding programmes across different Australian states),  
133 Category C (most recently released elite cultivars, released between 2006 and 2019); and  
134 Category D (unreleased breeding and research lines). A detailed description of the Australian  
135 varieties, including the year of release and breeder, is provided in S1 File.

136 The polymorphism information content (PIC) was estimated to evaluate the frequency of  
137 nucleotide variants across the entire barley population, as well as in subpopulations based on

138 geographical regions or historical subgroups of Australian barley. From the genetic variant  
139 data for all 632 accessions in the barley panel, the PIC was estimated to be 0.17 (Table 1),  
140 although we observed marked differences among different geographical regions (Australia,  
141 Africa, Asia, Europe, North America, and South America) and among historical subgroups of  
142 Australian barley. Within historical subgroups of Australian cultivars, the observed mean PIC  
143 values were slightly higher for varieties released between 2006 and 2019 (CatC) and  
144 unreleased research and breeding lines (CatD) (both 0.16) than for varieties released between  
145 1903 and 1998 (CatA, 0.14) or between 1999 and 2005 (CatB, 0.15).

146

147 **Table 1: Summary of molecular diversity and polymorphism information**  
148 **content for the whole panel and all subgroups.**

| Group              | Average MAF | PIC  | N   |
|--------------------|-------------|------|-----|
| Whole panel        | 0.14        | 0.17 | 632 |
| 2-row group        | 0.14        | 0.17 | 579 |
| 6-row group        | 0.15        | 0.18 | 48  |
| Spring             | 0.14        | 0.17 | 520 |
| Winter/facultative | 0.14        | 0.17 | 41  |
| Australian (all)   | 0.13        | 0.16 | 227 |
| Australian (CatA)  | 0.12        | 0.14 | 16  |
| Australian (CatB)  | 0.13        | 0.15 | 14  |
| Australian (CatC)  | 0.13        | 0.16 | 17  |
| Australian (CatD)  | 0.13        | 0.16 | 180 |
| European           | 0.13        | 0.16 | 141 |
| North American     | 0.14        | 0.17 | 183 |
| South American     | 0.13        | 0.16 | 34  |
| Asian              | 0.15        | 0.18 | 24  |
| African            | 0.13        | 0.15 | 15  |

157

158 MAF: Minor allele frequency. PIC: Polymorphism information content. N: Number of  
159 genotypes per group (where information available, see S1 File). CatA: Cultivars released  
160 between 1903 and 1998, CatB: cultivars released between 1999 and 2005; CatC: cultivars  
161 released between 2006 and 2019; Cat D: breeding and research lines.

162

163 **Population structure within the global collection of domesticated barley varieties**

164 Underlying population structure is known to be a confounding factor in GWASs, particularly  
165 for adaptive traits such as flowering time [16]. Known sources of population structure in  
166 domesticated barley varieties include the separation of two-row and six-row barleys, which  
167 occurred early in domestication (~8,000 years ago), as well as the separation of spring and  
168 winter barleys, which accelerated the migration of barley through the modification of the  
169 vernalisation requirement and photoperiod response [17,18]. Next, we therefore investigated  
170 the population structure of the global barley germplasm collection used in this study using  
171 ADMIXTURE [19] to select the optimal number of subpopulations (K), which we predicted  
172 was approximately  $K = 12$  (S4 and S5 Figs; Figs 1a–d).

173

174 **Fig 1: Population structure of the global barley panel.** a) Population structure of the  
175 entire barley panel was inferred by assuming twelve subpopulations (K) (S4 Fig). Each  
176 colour represents a different subpopulation as per the legend. Distribution of  
177 ADMIXTURE-defined populations based on b) seven geographical locations, c) three growth  
178 habits, and d) two row types. The neighbour-joining trees of 632 barley genotypes with  
179 clusters highlighted are based on e) geographic location or f) growth habit. The trees were  
180 constructed from simple matching distances of 33,486 common genetic variants in the barley  
181 population. Fac., facultative.

182

183 Phylogenetic trees were constructed based on the genetic distances of the entire population  
184 (Figs 1e and f), as well as on the genetic distances of 47 Australian cultivars selected to  
185 represent the diversity of germplasm used in Australian barley breeding (S6 Fig) using the  
186 Neighbour-joining (NJ) clustering method. Distinct clusters were detected based on  
187 geographic location (Fig 1e), row type, and growth habit (Fig 1f). As expected, no clear



188 clustering pattern was observed based on historical subgroups (S6 Fig), as within our  
189 Australian barley panel, many of the cultivars that were first to be released are ancestors of  
190 modern cultivars. Principal component analysis (PCA) was performed with separation based  
191 on row type, growth habit, or geographic region (S7a–c Figs), corroborating the results of  
192 phylogenetic analyses. Taken together, our data suggest that three major factors account for  
193 the partitioning of diversity within the global barley panel: geographic origin (Asia, Middle  
194 East, North America, and South America) (S7a Fig), growth habit (winter vs. spring) (S7b  
195 Fig), and row type (six-row vs. two-row) (S7c Fig). However, no clear clustering pattern was  
196 observed among European, African, and Australian genotypes, which is likely due to the  
197 extensive movement of germplasm from Europe to Australia and extensive use of diverse  
198 African lines in Australian and European breeding programmes [15].

199 To understand the patterns of linkage disequilibrium (LD) between different chromosomes,  
200 we calculated  $r^2$  values between pairs of genetic variants for all 632 genotypes, as well as in  
201 the four Australian subpopulations (S8 Fig). LD was estimated for each subpopulation as a  
202 function of physical distance (Fig 2).

203

204 **Fig 2: Genome-wide linkage disequilibrium (LD) decay in different historical groups**  
205 **of domesticated Australian barley genotypes.** Values are reported as mean LD  $r^2$  for all  
206 pairs of genetic variants binned by distance (100 kb). Curves were fitted by a LOESS  
207 function. CatA: Cultivars released between 1903 and 1998, CatB: cultivars released between  
208 1999 and 2005, CatC: cultivars released between 2006 and 2019, Cat D: breeding and  
209 research lines, Total: total barley population of 632 varieties.

210

211 Genetic marker pairs were sorted into 100-kb bins based on the distance between pairs, and  
212 mean  $r^2$  values were estimated for each bin (S2–6 Files). Owing to selection pressure on large  
213 genomic regions for positive alleles, the subsequent fixation of the alleles during breeding,  
214 and high rates of self-fertilization, Australian barley subgroups (CatA to CatC) were found to  
215 contain larger LD blocks, higher baseline LD, and higher long-range LD than the entire  
216 barley panel used in this study. Long-range LD was more extensive in historical barley  
217 cultivars (CatA and CatB) than in more recently released barley cultivars (CatC) owing to the  
218 greater extent of allelic association in the early period of barley breeding, thereby confirming  
219 the narrow initial gene pool of early breeding programmes [15].

220

### 221 **Selection footprints of barley breeding**

222 To explore selection footprints resulting from breeding within the global barley panel, next  
223 we investigated genetic diversity parameters in for the whole population, between barley  
224 genotypes sourced from different geographic regions, and within Australian subgroups based  
225 on release date. We first examined the degree of polymorphism along each chromosome  
226 within different geographic region and among historical Australian barley groups by  
227 calculating the nucleotide diversity statistic  $\pi$  [20] (S9 and S10 Figs). The distribution of  
228 nucleotide diversity indicates limited allelic diversity in domesticated barley genotypes and  
229 that modern breeding processes had measurably altered overall genetic diversity, which  
230 increased during a relatively short breeding period in Australian barley varieties (Fig 3a, S2  
231 Table).

232

233

234 **Fig 3: Genetic diversity and selection (breeding) signatures of different groups of**  
235 **domesticated barley genotypes.** a) Plots of nucleotide diversity index ( $\pi$ ) values and b)  
236 Tajima's D values to compare the average number of pairwise differences and the number of  
237 segregating sites between samples within each of our geographic and historical  
238 subpopulations in Australia (highlighted in light grey shading; a timescale is provided above  
239 the panel). Solid thin black horizontal lines indicate means, transparent horizontal bands of  
240 different colours indicate Bayesian 95% highest-density intervals (HDIs), black dots  
241 represent individual data points, full densities are shown as bean plots. c) Tajima's D  
242 distribution among the different historical groups of domesticated Australian barley  
243 genotypes and d) barley varieties from different geographic regions. Filled circles show  
244 values above the 99<sup>th</sup> percentile and are colour coded according to the different historical or  
245 geographic groups as indicated in the legends within the panels. Boxes point to data points  
246 above the 99<sup>th</sup> percentile that are located within phenology-related genes. Details are further  
247 described in the figure. All statistics are based on 10-Mb windows. CatA: Cultivars released  
248 between 1903 and 1998; CatB: cultivars released between 1999 and 2005; CatC: cultivars  
249 released between 2006 and 2019; Cat D: breeding and research lines.

250

251 The nucleotide diversity index  $\pi$  varied between barley varieties from the six geographic  
252 regions, with the highest and lowest genetic diversities observed in Asian and African  
253 barleys, respectively. A gradual increase in nucleotide diversity was detected when  
254 comparing historical cultivars (CatA) to the later (CatB) and the most recently released  
255 Australian cultivars (CatC). Our results are consistent with a continuous increase in diversity  
256 through breeding, as observed between CatA and CatB (representing a ~8.9% higher  
257 nucleotide diversity in cultivars released between 1998 and 2005 than in cultivars released

258 between 1903 and 1998). The continuous increase in diversity between groups CatA and  
259 CatC (representing a ~12.5% higher nucleotide diversity in cultivars released between 2005  
260 and 2019 than in cultivars released between 1903 and 1998) reflect the increased use of  
261 exotic germplasm bred into modern Australian barleys [15] and breeding improvement in  
262 early Australian barley breeding programmes. These findings show that despite six decades  
263 of intense breeding of Australian barley cultivars, higher genetic variation exists within the  
264 current breeding gene pool compared to historical varieties.

265 We also calculated subpopulation-specific estimates of Tajima's D to compare the average  
266 number of pairwise differences and the number of segregating sites between samples within  
267 each of our geographic and historical subpopulations in Australia. The sign of Tajima's D  
268 provides an interpretation of natural selection, where balancing selection results in a positive,  
269 and positive selection results in a negative Tajima's D. Subpopulation-specific estimates of  
270 Tajima's D differed extensively, and included both negative and positive values, but with a  
271 strong and consistent skew towards positive mean values for all subpopulations (Fig 3b, S11  
272 and S12 Figs). In addition, we observed an excess of rare alleles relative to expectation  
273 (corresponding to negative Tajima's D values in the top 1% tail of the empirical distribution)  
274 for five phenology-related genes in historical Australian barley groups and seven phenology-  
275 related genes in geographic subpopulations, including known phenology genes *FLOWERING*  
276 *LOCUS T2* (*HvFT2*) and *AGAMOUS 1* (*HvAG1*) in North American and in CatD Australian  
277 subpopulations (Figs 3c and d). We also observed positive Tajima's D values, indicating a  
278 lack of rare alleles relative to expectation, which corresponds to a sudden population  
279 contraction, likely associated with the introduction of barley varieties to Australia and other  
280 countries (Figs 3c and d). Positive Tajima's D values were detected for phenology-related  
281 genes in historical Australian barley groups, including *FLOWERING LOCUS T1* (*HvFT1*) for

282 the earliest- (CatA) and latest-released (CatC) Australian barley cultivars (Fig 3c), as well as  
283 for the North American and Asian varieties (Fig 3d).

284 To unravel genomic regions targeted by breeders in efforts to improve barley production in  
285 Australia in the last 120 years, we next explored loci in the barley genome that harbour  
286 selective sweeps related to breeding. To accomplish this, we examined population  
287 differentiation using the fixation index ( $F_{ST}$ ) (S13 Fig), reduction of diversity (ROD), and  
288 cross-population composite likelihood ratio [21] (XP-CLR) test scores, and compared these  
289 results within the Australian panel between the groups CatB and CatC groups (which have  
290 been subjected to recent breeding efforts) and those for the oldest group, CatA (Fig 4, S13–15  
291 Figs).

292

293 **Fig 4: Breeding selection signatures of domesticated Australian barley genotypes. a)**

294 Pirate plot of the genetic differentiation fixation index ( $F_{ST}$ ) values between different  
295 historical groups of domesticated Australian barley genotypes (a timescale from 1903 to 2019  
296 is provided above the panel). Solid thin black lines indicate means, black horizontal bands  
297 indicate Bayesian 95% highest-density intervals (HDIs), black dots represent individual data  
298 points, full densities are shown as bean plots. b)  $F_{ST}$  values and cross-population composite  
299 likelihood ratio (XP-CLR) test scores for CatA, CatB, and CatC historical barley groups on  
300 each chromosome (Chr.), illustrating the range of variation in diversity between these groups.  
301 c) Reduction of Diversity (ROD) distribution between the CatA and CatB historical barley,  
302 and d) distribution between the CatA and CatC historical barley groups. Highlighted regions  
303 (as per the legend for b and yellow bars for c and d) are above the 95<sup>th</sup> percentile ( $F_{ST}$  and  
304 ROD), or above the 99<sup>th</sup> percentile (XP-CLR). Boxes indicate regions located within  
305 phenology-related genes, with details further described in the figure. All statistics are based

306 on 10-Mb windows. CatA: Cultivars released between 1903 and 1998, CatB: cultivars  
307 released between 1999 and 2005, CatC: cultivars released between 2006 and 2019.

308

309 We identified substantial population differences (high  $F_{ST}$ , Figs 4a and b) and genomic  
310 regions with substantially lower levels of diversity in more recently released cultivars than in  
311 historical cultivars (CatB and CatC groups, high ROD, Figs 4c and d) as possible candidate  
312 regions that were under selection during breeding in the recent past. To further assess the  
313 extent of genetic differentiation between early and recent Australian barley cultivars, we also  
314 used likelihood ratio (XP-CLR) tests [21] to identify genomic regions that had been  
315 differentially selected between the groups (Fig 4b). Regions above the 99<sup>th</sup> percentile of XP-  
316 CLR selection signals were considered candidates that had undergone selection during  
317 breeding, revealing 8 regions from the individual comparisons (CatA–CatB and CatA–CatC),  
318 of which 6 were adjacent to high- $F_{ST}$  loci (Fig 4b). Based on the XP-CLR analysis, regions  
319 that had undergone selection contained 459 variants from 4 genes, with different regions  
320 between the two historical subpopulations.

321 In total, we identified 69 candidate regions with 922 potential genes that were potentially  
322 under selection during crop breeding, post-domestication and diversification in Australian  
323 barley (S7 and S8 Files). Among those genes, we identified 17 unique phenology-related  
324 genes, including gibberellin metabolism-related genes (the gibberellin oxidases *HvGA2ox8*,  
325 *HvGA20ox2*, *HvGA20ox4*, and *HvGA2ox4* and the gibberellin receptor genes *HvGIDIL2* and  
326 *HvGIDIL3*), *HvFT3* (also known as *PHOTOPERIOD 2*, *HvPPD-H2*), *EARLY FLOWERING*  
327 *4-like4* (*HvELF4-like4*), and a homologue of *FLOWERING LOCUS T1* (*HvFT1-1*). More  
328 than 53% of the detected SNPs within these genes exhibited large differences in allele  
329 frequency among the different historical categories ( $\geq 20\%$ ; S4 Table). To investigate possible

330 functions of all candidate genes, we performed gene ontology and pathway enrichment  
331 analyses, revealing that genes under selection during barley breeding were related to  
332 responses to oxidoreductase activity, peroxidase activity, and antioxidant activity (S16 Fig,  
333 S9 File).

334 We next predicted the variant effects of the 3,105 genetic variants located within the 69  
335 candidate regions under selection in the 47 Australian barley cultivars within CatA, CatB,  
336 and CatC. Most genetic variants were detected in downstream (28%) or upstream gene  
337 regions (22%), while a large proportion of variants that fell within coding regions were  
338 missense variants (44%) (S17 Fig). Using a sorting intolerant from tolerant (SIFT) analysis,  
339 we identified 119 missense tolerated and deleterious mutations in 42 genes (S10 File). Of  
340 these variants, 29 were detected and annotated within 12 genes that exhibited large  
341 differences in allele frequency among the three historical categories ( $\geq 20\%$ ; S5 Table). These  
342 12 genes—which based on the categories we conclude have been under selection during the  
343 past 120 years—were observed only on chromosome 7H. Hence, these genes are attractive  
344 candidates for further investigation, as they may hold the potential to enhance agronomic  
345 traits in Australian barleys through breeding.

346

### 347 **GWAS of agronomic traits**

348 We field trialled and scored all 632 barley genotypes in the global barley panel for three key  
349 agronomic traits—flowering time (using days to Zadoks stage 49 [ZS49] as an equivalent for  
350 flowering time [22]), grain yield, and plant height—in sixteen independent field experiments  
351 at field sites located across the Western Australian wheatbelt region (Geraldton, Merredin,  
352 Katanning, Perth, and Esperance) conducted between 2015 and 2017. To evaluate the trait  
353 stability of the global barley panel across all locations and years, we calculated the coefficient  
354 of variation (CV) and heritability of each trait across all field trials (S11 and S12 Files). Z

355 scores calculated per genotype for each field trial and trait revealed specific genotypes in the  
356 global barley panel with stable, consistent, and robust trait characteristics across the different  
357 field trials (S12 File). For example, the 2-row hulless and very early-maturing Canadian  
358 variety CDC Speedy was one of the earliest-flowering varieties, irrespective of location or  
359 year, whereas Spanish landrace 355 was consistently late-flowering and tall-growing across  
360 all environments and years.

361 We then performed a multi-environment and multi-year GWAS to test if genetic variation  
362 identified from the global barley panel is associated with the key agronomic traits flowering  
363 time, grain yield, and plant height. We used 33,486 filtered genetic markers with a  
364 MAF > 0.01 for GWASs based on two statistical models, generalized linear models (GLMs)  
365 and mixed linear models (MLMs). Manhattan plots and quantile-quantile (QQ) plots of the  
366 three traits are provided in S18–20 Figs. A graphical genotype map of selected significant  
367 genetic variants detected for all three traits is shown in Fig 5, and a similar map that includes  
368 P-values and marker  $r^2$  values is shown in S21 Fig.

369

370 **Fig 5: Graphical genotype map of selected genetic variants associated with three**  
371 **agronomic traits.** Significant genetic variants detected via genome-wide association studies  
372 for flowering time (FT, measured as days to Zadoks stage 49 [ZS49]), grain yield (GY), and  
373 plant height (PH). Only stable, consistent, and/or robust markers are shown (S13–15 Files).  
374 Selected genetic variants (consistent and/or robust markers) that also fall within candidate  
375 regions for breeding selection are marked with orange asterisks. Plots drawn using the  
376 PhenoGram [50] software tool.

377

378 First, we consider the genetic variation associated with flowering time. Across all field trials,  
379 we identified 1,132 significant unique marker-trait associations (MTAs) (false discovery rate



380 [FDR] of  $P < 0.05$ ) for flowering time located within 327 unique genes with functional  
381 annotations, each explaining up to 18.7% of the phenotypic variation (S13 File, S18 Figure).  
382 These regions include known phenology-related genes, such as *HvPPD-H1*,  
383 *PHYTOCHROME C (HvPhyC)*, *PROTEIN KINASE 2A (HvCK2A)*, *HvADA2*,  
384 *PHYTOCHROME-ASSOCIATED PROTEIN 2 (HvPAP2)*, and *VERNALIZATION H1*  
385 (*HvVRN-H1*) [4,10-12]. Furthermore, a total of 246 MTAs were considered to be ‘stable’, 76  
386 MTAs were considered to be ‘consistent’, and 73 MTAs were considered to be ‘robust’ (S13  
387 File). More than 30% of the significant MTAs were also detected in our previous study [10],  
388 in which a GWAS was performed using 4,600 SNPs (in comparison to the 33,486 SNPs used  
389 in the present study) obtained from target enrichment sequencing data for phenology genes  
390 combined with field trial data from 2015 and 2016. Here, novel and highly significant MTAs  
391 were located within the genes HORVU5Hr1G096560 (disease resistance protein),  
392 HORVU5Hr1G095040 (beta glucosidase C), and HORVU5Hr1G104240 (zinc finger A20  
393 and AN1 domain-containing stress-associated protein 6) on chromosome 5H (S13 File).  
394 Notably, we also detected novel associations with candidate phenology-related genes that  
395 were not included in the previous target-enrichment sequencing study [10] but that have  
396 annotations linking them to roles in flowering time regulation, including CCT and PRR  
397 motifs characteristic of key phenology genes such as *HvCOI*, *HvVRN-H2*, and *HvPPD-H1*  
398 [4]. These genes included HORVU1Hr1G011030 and HORVU5Hr1G125620 (both  
399 annotated as COP1-interacting protein-related), HORVU2Hr1G055130 and  
400 HORVU7Hr1G044380 (both annotated as CONSTANS, CO-like, and TOC1 [CCT] motif  
401 family protein, and HORVU3Hr1G092330 and HORVU6Hr1G008870 (both annotated as  
402 pentatricopeptide repeat-containing protein).

403 Next, we consider the genetic variation associated with grain yield. We identified 118  
404 significant unique MTAs for grain yield, 30 of which were ‘robust’, with each MTA  
405 explaining up to 7.2% of the phenotypic variation (none were consistent or stable). We  
406 identified genetic variants within 30 functionally annotated genes (S14 File, S19 Fig). These  
407 regions included known phenology-related genes, such as *HvFT2* and *HvGA20ox2*. Like the  
408 results for flowering time, more than 30% of the significant MTAs for grain yield were also  
409 detected in our previous study [10]. Here, novel and highly significant MTAs were located  
410 within the genes HORVU2Hr1G125100 (peroxidase superfamily protein),  
411 HORVU7Hr1G002260 (disease resistance protein CC-NBS-LRR class family), and  
412 HORVU7Hr1G045290 (aluminum-activated malate transporter 9).

413 Finally, for plant height, we identified 1,279 significant unique MTAs within 395  
414 functionally annotated genes, each explaining up to 8.9% of the phenotypic variation,  
415 including several gibberellin oxidase genes (*HvGA2ox4*, *HvGA20ox4*, and *HvGA2ox1*) and in  
416 particular the *sdw1/denso* gene (*HvGA20ox2*), a major determinant of plant height [23] (S15  
417 File, S20 Fig). Furthermore, a total of 190 MTAs were considered to be ‘stable’, one MTA  
418 was considered to be ‘consistent’, and 61 MTAs were considered to be ‘robust’ (S14 File). Of  
419 these significant MTAs, approximately 8% were detected in our previous study [10]. Novel  
420 and highly significant MTAs were located within the genes HORVU3Hr1G021140 (gigantea  
421 protein GI), HORVU3Hr1G022170 (homeobox-leucine zipper protein ROC4), and  
422 HORVU3Hr1G089160 (AP2-like ethylene-responsive transcription factor). Our data also  
423 revealed relevant candidate genes for functional annotation that are known to have pleiotropic  
424 effects on several agronomic traits, as exemplified by the major flowering time and plant  
425 height associations detected on chromosome 5H, where *HvPhyC* was a major driver (S13  
426 File), an association previously detected and discussed in detail [10].

427 Combining the GWAS with the results from the selective sweep analysis, we then compared  
428 genes containing MTAs for all three traits (flowering time, grain yield, and plant height) with  
429 genes located within the 69 candidate regions under selection that are related to breeding in  
430 Australian barley (S8 File). The results show that 23, 7, and 23 genes with significant MTAs  
431 for all three traits, respectively, are located within breeding-related genomic regions (S13–15  
432 Files) including the known phenology genes *HvPPD-H1*, *AGAMOUS-LIKE GENE 1*  
433 (*HvAGLGI*), and *HvGA2ox3*. These results indicate that a subset of breeding loci are relevant  
434 for continued agronomic trait improvement and may have undergone additional selection to  
435 allow introduced European barleys to adapt to Australian growing conditions.

## 436 **Discussion**

437 The conservation of genetic diversity for the future breeding of new crop varieties is  
438 particularly important in mitigating the adverse impacts of climate change on crop  
439 production. In this study, we assessed the contributions of both historical and recent breeding  
440 efforts towards local adaptation and crop improvement in a global barley panel of 632  
441 genotypes. We used Australian barley as a model for the profound impact that breeding  
442 efforts had on developing a previously poorly adapted crop suitable to local environments.  
443 Most Australian and international cultivars in the global barley panel were varieties that led  
444 the market when they were released. Thus, this study panel represents the long-term breeding  
445 progress for the world's fourth-most, and Australia's second-most widely grown crop at peak  
446 agronomic performance.

447 The current study employed ~34,000 genetic markers—approximately 9 times more markers  
448 than used in previous studies of barley [10-12]—to perform diversity, selection footprint, and  
449 high-resolution GWAS analyses of agronomically relevant traits. The diversity analyses  
450 revealed that the most recently released Australian cultivars exhibited more than 12% higher

451 nucleotide diversity than earlier-released cultivars. Thus, our results show that modern  
452 Australian barley cultivars are not genetically depauperate in comparison to historical  
453 varieties, which counters the common perception that intensive breeding leads to the erosion  
454 of adaptive genetic diversity in modern cultivars [1,2]. This notion is supported by several  
455 recent reports on cereal crops such as wheat, which demonstrate that genetic diversity has not  
456 been reduced in European wheat cultivars over the past five decades of progress in breeding  
457 [24,25]. Moreover, the faster LD decay and lower level of long-range LD of more recently  
458 released cultivars indicate that recent breeding efforts have increasingly integrated lines with  
459 more diverse genetic backgrounds into the pool of Australian germplasm. These observations  
460 also highlight the importance of breaking these large linkage blocks in future breeding efforts  
461 by increasing genetic diversity through new genetic crosses, such as unreleased breeding and  
462 research lines, landraces, and selected wild barley to eliminate the genetic hitchhiking of  
463 disadvantageous alleles within these LD blocks.

464 The selection footprint analyses for different Australian subpopulations detected substantial  
465 population differences (high  $F_{ST}$ ) and genomic regions with substantially lower levels of  
466 diversity in more recently released cultivars than in historical cultivars (CatB and CatC  
467 groups, high ROD) as possible candidate regions that were under selection during breeding in  
468 the recent past. We estimate that 2.3% of barley genes (i.e. 922 genes) fall into the selected  
469 category and thus have been affected by breeding selection in Australian barley. An excess of  
470 rare alleles relative to expectation for five phenology-related genes in historical Australian  
471 barley groups and seven phenology-related genes in geographic subpopulations are consistent  
472 with an increase in population size following a bottleneck or a selective sweep, and could  
473 indicate strong selection during post-domestication (breeding) diversification. Notably, a lack  
474 of rare alleles for the vernalisation response genes *VERNALISATION INSENSITIVE 3*  
475 (*HvVIN3*) and *HvZCCT-Hb* (the latter of which is a homologue of the *VERNALIZATION H2*

476 (*VRN-H2*) locus) was detected for European and South American barley varieties,  
477 respectively. As the ancestor of domesticated barley is likely a winter-type wild barley [26],  
478 advantageous mutations in vernalisation response genes may have resulted in flowering time  
479 promotion in the absence of cold which facilitated the expansion of cultivable areas closer to  
480 the equator, pointing towards balancing selection for vernalisation requirements during past  
481 breeding efforts.

482 Next, we performed high-resolution GWAS analyses of agronomically relevant traits, and  
483 detected novel and highly significant MTAs for all three traits not detected in our previous  
484 study [10,11]. For example, we detected novel and highly significant MTAs for plant height,  
485 located within the phenology genes HORVU3Hr1G021140 (*gigantea* protein *GI*), and  
486 HORVU3Hr1G022170 (homeobox-leucine zipper protein *ROC4*). *ROC4* regulates the  
487 transcript levels of *GRAIN NUMBER, PLANT HEIGHT, AND HEADING DATE7 (Ghd7)* and  
488 causes long day-dependent early flowering in rice [27], whereas *GI* is a circadian  
489 clock-controlled gene responsible for fine-tuning plant developmental processes in response  
490 to photoperiod [28]. For grain yield, novel and highly significant MTAs were located within  
491 the genes HORVU2Hr1G125100 (peroxidase superfamily protein), HORVU7Hr1G002260  
492 (disease resistance protein CC-NBS-LRR class family), and HORVU7Hr1G045290  
493 (aluminum-activated malate transporter 9), which all play functional roles in pathogen and  
494 abiotic stress resistance [29,30]. Interestingly, a gene encoding a CC-NBS-LRR-class disease  
495 resistance protein was recently reported to be associated with grain yield in chickpea [31].

496 Finally, the diversity, selection footprint, and GWAS analyses performed in the present study  
497 demonstrate that several key loci, including major phenology genes such as *HvPPD-H1*,  
498 harbour coincident signals, supporting the view that a subset of breeding loci is relevant to  
499 the continued improvement of agronomic traits and have undergone additional selection in

500 the adaptation of introduced European barleys to Australian growing conditions. It will be  
501 interesting to follow-up these results with detailed genetic analyses on individual genes to  
502 characterize their functions in more detail.

503 In summary, our combined variant dataset and germplasm collection provide a rich source of  
504 genetic information that can be applied to understanding and improving diverse traits, such as  
505 environmental adaptation and enhanced yield, and could accelerate genetic gains in future  
506 barley breeding.

507

## 508 **Materials and Methods**

### 509 **Ethics Statement**

510 The research for this project does not require ethics approval in Australia. All data are  
511 available in the supplementary documents and public database.

512

### 513 **Plant material**

514 The barley panel consisted of 632 genotypes, including 250 cultivars and 382 breeding and  
515 research accessions from 37 countries throughout Europe, Asia, North and South America,  
516 Africa, and Australia, and were selected from over 4,000 accessions preserved at the Western  
517 Barley Genetics Alliance at Murdoch University (Perth, Australia) to represent barley  
518 genotypes from major global barley breeding programmes. For a detailed description of all  
519 lines and varieties used in this study, see S1 File. This panel spanned the entire spectrum of  
520 cultivated barley, consisting of two- (92%) and six-row (8%) genotypes, and of winter (7%),  
521 spring (92%), and facultative (1%) growth habits. The selected germplasm also included 47  
522 Australian cultivars released since 1903 as well as 180 Australian breeding and research  
523 lines. All cultivars of the global barley panel are highly productive and genetically uniform

524 commercial varieties developed by professional plant breeders, whereas the all breeding and  
525 research lines include germplasm collections for potential use in developing future cultivars.

526

### 527 **Field experiments and phenotypic data**

528 A total of 16 field experiments were conducted in 2015, 2016, and 2017 across a variety of  
529 environments in Western Australia (South Perth, Geraldton, Katanning, two sites at Merredin  
530 and Esperance, respectively). The number of cultivars of the global barley panel tested at each  
531 field site are provided in S11 File. In Western Australia, Geraldton, South Perth, and  
532 Esperance are located along the coast of the Southern Ocean and all receive high annual  
533 rainfall but have very different daily maximum temperatures (the Geraldton site being the  
534 warmest, and the Esperance site being the coolest). The distance between Geraldton and  
535 Esperance is over 1,100 km. The Merredin site is located inland and receives little rainfall,  
536 while the Katanning site receives a medium amount of rainfall. The experimental design for  
537 field trial sites was performed as previously described [10]. Briefly, all regional field trials  
538 (partially replicated design) were planted in a randomized complete block design using plots  
539 of 1 by 3 m<sup>2</sup> laid out in a row-column format. Field trials in South Perth were conducted  
540 using a hill plot technique with a 40-cm distance within and between rows due to space  
541 limitations. Seven control varieties were used for spatial adjustment of the experimental data.

542 Measurements were taken at each plot of each field experiment in the study to determine  
543 flowering time (days to ZS49), plant height, and grain yield as previously described [10].  
544 Briefly, plant maturity was recorded as the number of days from sowing to 50% awn  
545 emergence above the flag leaf (ZS49) [32], as a proxy for flowering time [22]. Plant height  
546 was determined by estimating the average height from the base to the tip of the head of all  
547 plants in each plot. Grain yield (kg ha<sup>-1</sup>) was determined by destructively harvesting all plant  
548 material from each plot to separate the grain and determining grain mass. Grain yield data

549 collected in the 2015, 2016, and 2017 field experiments, as well as plant height and plant  
550 maturity data for the 2017 field trials, were analysed using linear mixed models (LMMs) in  
551 ASReml-R (<https://www.vsni.co.uk/software/asreml-r/>) to determine best linear unbiased  
552 predictions (BLUPs) or best linear unbiased estimations (BLUEs) for each trait for further  
553 analysis. Local best practices for fertilization and disease control were adopted for each trial  
554 site.

555

### 556 **Evaluation of agronomic trait stability across field sites and genotypes**

557 To evaluate the yield stability of global barley panel across all location and year scenarios in  
558 the main trials, we calculated the CV for flowering time, grain yield, and plant height across  
559 all location-by-year combinations, along with Z scores according to Equation 1:

560

$$561 \quad Z = \frac{x_{ij} - \mu_j}{\sigma} \quad (1)$$

562

563 where  $x_{ij}$  is the trait value of variety  $i$  for year-by-location combination  $j$ ,  $\mu_j$  is the mean of the  
564 trait value for all plants of variety  $i$  in  $j$ , and  $\sigma$  is the standard deviation of the population  
565 mean.

566 Z scores were used to determine above- (positive Z score) and below-average (negative Z  
567 score)-yielding cultivars, as well as cultivars that flowered earlier (negative Z score) or later  
568 (positive Z score) or were shorter (negative Z score) or taller (positive Z score) than average  
569 for all year-by-location combinations. The critical Z score values for a 95% confidence level  
570 were  $-1.96$  and  $+1.96$  standard deviations, equal to a P-value of 0.05. Genotype trait  
571 characteristics (e.g. early flowering, high yielding, or short stature) were defined as ‘robust’ if  
572 they were consistently below or above the population mean in one location, ‘stable’ if they



573 were significant (less than  $-1.96$  or greater than  $+1.96$  standard deviation) in more than one  
574 location, and ‘consistent’ if they were significant (less than  $-1.96$  or greater than  $+1.96$   
575 standard deviation) across at least two years at one or more locations.

576

#### 577 **DNA extraction**

578 Genomic DNA was extracted from the leaves of a single barley plant per variety using the  
579 cetyl-trimethyl-ammonium bromide (CTAB) method as previously described [10,11]. DNA  
580 quality was assessed on 1% agarose gels and quantified using a NanoDrop spectrophotometer  
581 (Thermo Scientific NanoDrop Products, Wilmington, Delaware USA).

582

#### 583 **Sequencing, sequence alignment, genotype calling, variant discovery, and variant 584 prediction**

585 As the barley genome is quite large ( $\sim 5.1$  Gb), and the genome consists of  $>80\%$  mobile and  
586 repeated elements, whole-genome re-sequencing is a cost-intensive approach to  
587 comprehensively catalogue genetic diversity. To circumvent this limitation, we used a  
588 combination of three sequencing methods (target-enrichment sequencing, low-coverage  
589 WGS, and DArTseq) to capture variation in and around the gene-containing regions of the  
590 632 barley genotypes.

591

#### 592 **Target-enrichment sequencing**

593 To assess the genetic diversity of phenology and phenology-related genes in the global  
594 collection of barley landraces and cultivars, we designed a custom target-enrichment  
595 sequencing assay for loci implicated in the flowering pathway in barley and related plant  
596 species, as previously described [10,11]. In short, the target-enrichment sequencing of  
597 genomic DNA regions was performed by solution-based hybrid capture using a synthetic

598 library consisting of 13,588 RNA probes (MYbaits, MYcroarray®, Ann Arbor, MI, USA)  
599 following the manufacturer's protocol (v.2.3.1). Post-capture DNA libraries were combined  
600 into 10 pools of approximately 96 samples each and sequenced on three lanes on an Illumina  
601 HiSeq 3000 (Illumina Inc., San Diego, CA, USA) to generate approximately 0.5 million  
602 2x150-bp paired-end reads per sample. Genome sequencing was conducted at AgriBio  
603 (Centre for AgriBioscience, Bundoora, VIC, Australia). Sequence files were post-run filtered  
604 and aligned to the latest release of the barley reference genome assembly [7] (IBSC v2) using  
605 Nuclear software v.3.6.16 (GYDLE Inc., Montreal, Canada). SNP variant discovery and  
606 genotype calling were performed using custom Perl scripts to produce a variant call format  
607 (VCF) v.4.2 genotype file based on the alignment files as previously described [10,11]. Only  
608 SNPs with <10% missing values and a MAF >1% (4,260 SNPs) were used for subsequent  
609 analyses.

610

### 611 **Low-coverage whole genome sequencing**

612 Each sample for low-coverage (1x) WGS consisted of a pool of 20 individual barley pre-  
613 capture DNA libraries from the target-enrichment sequencing experiment, dissolved in 10  
614 mM Tris HCl (pH of 8.0). Thirty microliters of the pooled remainders of pre-capture DNA  
615 libraries were subjected to low-coverage WGS by the Beijing Genome Institute (BGI, Hong  
616 Kong) on an Illumina HiSeq 4000 to generate approximately 50 million 2x150-bp paired-end  
617 reads per sample. The latest release of the barley reference genome assembly (IBSC v2) was  
618 used as a reference to map the clean reads with the alignment algorithm BWA-MEM [33]  
619 using default parameters. Duplicates were marked and removed using Picard v.1.129  
620 (<http://broadinstitute.github.io/picard/>). Only reads with unique mapping positions in the  
621 reference genome were retained and used to detect genomic variations (SNPs and InDels).

622 InDels and SNPs were detected by running three rounds of SAMtools v.1.7 plus BCFtools  
623 v.1.7 and the Genome Analysis ToolKit [34] (GATK v.3.8) variant-calling pipeline. Briefly,  
624 the first round was performed with SAMtools plus BCFtools, with filtering based on both  
625 mapping quality and variant calling quality. The result of the first round was used as a guide  
626 for realignment around potential InDels and variant calling for the second round of GATK.  
627 The common variants detected by both the SAMtools plus BCFtools pipeline and the GATK  
628 pipeline were used to guide variant calling in the third round using GATK.

629

### 630 **Genotyping-by-sequencing by DArTseq**

631 In addition, DArTseq GBS was performed using the DArTseq platform (DArT PL, Canberra,  
632 NSW, Australia) according to the manufacturer's protocol  
633 (<https://www.diversityarrays.com/>). Briefly, 100  $\mu$ l of 50 ng  $\mu$ L<sup>-1</sup> DNA was sent to DArT PL,  
634 and GBS was performed using complexity reduction followed by sequencing on a HiSeq  
635 Illumina platform as previously described [35]. DArTseq marker sequences were aligned  
636 against the Morex barley genome assembly [7] IBSC v.2. The genetic position of each  
637 marker was determined based on the Morex physical reference assembly. Filtered DArTseq  
638 GBS (<10% missing values and minor allele frequency [MAF] >1%) yielded 14,032 SNPs  
639 across all 632 samples.

640 Stringent filtering steps were adopted to obtain clean data as previously described [10,11].

641 All genotype data were combined, filtered based on duplicates and MAF >1%, and imputed  
642 using BEAGLE v.4.1 [36] to yield a final number of 33,486 filtered genetic markers (32,645  
643 SNPs and 841 InDels) with a MAF > 1%.

644

## 645 **Population structure and genotype data analyses**

646 As previously described [10], the PIC was calculated for each of the 33,486 filtered genetic  
647 markers according to Equation 2:

648

$$649 \quad PIC = 1 - \sum_{i=1}^l P_i^2 - \sum_{i=1}^{l-1} \sum_{j=i+1}^l 2P_i^2 P_j^2 \quad (2)$$

650

651 where  $P_i$  and  $P_j$  are the population frequencies of the  $i^{\text{th}}$  and  $j^{\text{th}}$  alleles, respectively.

652 The ADMIXTURE v.1.3.0 model-based clustering algorithm [19] was used to investigate the  
653 subpopulation structure of the global barley panel. Prior to subpopulation structure analysis in  
654 ADMIXTURE, the genotype dataset was LD pruned using Plink v1.9 [37] with a window  
655 size of 50 kb, step size of 5, and pairwise  $r^2$  threshold of 0.5, yielding 18,869 genetic variants.  
656 A preliminary analysis was performed using 100 replicate runs by inputting successive values  
657 of K from 1 to 18, as previously described [10]. A 10-fold cross-validation procedure was  
658 performed with 100 different fixed initial seeds in multi-threaded mode for each K-value. The  
659 most likely K-value was determined using ADMIXTURE cross-validation error values.

660 CLUMPP [38] v.1.1.2 software was used to obtain the optimal alignments of 100 replicates  
661 for each K-value. Membership proportions of each genotyped individual were averaged  
662 across runs according to the permutation with the greatest symmetric similarity coefficient as  
663 described previously [10]. The output from CLUMPP for the optimal K-value was used to  
664 make plots using the cluster visualization package Pophelper v.2.2.3 [39] implemented in R  
665 v.3.5.1 (<http://www.R-project.org/>).

666 To summarize the genetic structure and variation present in the barley germplasm, PCA was  
667 also conducted using all 33,486 filtered genetic markers in TASSEL [40] v.5.2.39. The first  
668 three PCs were plotted against each other using the ‘scatter plot’ function in Microsoft Excel

669 2016. NJ trees were constructed using the Java application Archaeopteryx v.0.9909 [41]  
670 based on genetic distances calculated in TASSEL v.5.2.39. The sub-structures in the  
671 collection inferred using different methodologies were compared, and the final K-value was  
672 ascertained using ADMIXTURE [19].

673

#### 674 **Linkage disequilibrium**

675 Genome-wide LD analysis was performed for the global barley panel and subgroups using all  
676 33,486 filtered genetic markers using Plink v.1.9 [37]. LD was estimated by using squared  
677 allele frequency correlations ( $r^2$ ) between the intra-chromosomal pairs of loci [42]. The loci  
678 were considered to be in significant LD when  $P < 0.001$ . To investigate the extent of and  
679 average LD decay in the panel, significant inter- and intra-chromosomal  $r^2$  values within each  
680 100-kb bin were plotted against the physical distance (kb) between markers. Curves were  
681 fitted by a second-degree LOESS function using R v.3.5.1 (<http://www.R-project.org/>).

682

#### 683 **Diversity parameter estimation and detection of selective sweeps**

684 To detect genomic areas with selective sweeps driven by artificial (breeding) selection, we  
685 calculated  $F_{ST}$ ,  $\pi$ , and ROD using VCFtools v.0.1.14 [43] and a window size of 10 Mb.  $F_{ST}$   
686 estimates for pairs of subpopulations were calculated as previously described [44].  
687 Subpopulation-specific estimates of Tajima's D were calculated using VCFtools v.0.1.14 [43]  
688 to compare the average number of pairwise differences and the number of segregating sites  
689 between samples within each of our geographic and historical subpopulations in Australia.  
690 The ROD index was calculated for each 10-Mb window based on the ratio of diversity  
691 between Australian subpopulation CatB to that of CatA according to Equation 3:

692

$$693 \text{ ROD} = 1 - (\pi_{\text{CatA}} / \pi_{\text{CatB}}) \quad (3)$$

694

695 and between Australian subpopulation CatC to that of CatA according to Equation 4:

696

$$697 \text{ ROD} = 1 - (\pi_{\text{CatA}} / \pi_{\text{CatC}}) \quad (4)$$

698

699 where the nucleotide diversity statistic  $\pi$  is the average number of nucleotide differences  
700 between any two DNA sequences. In addition, whole-genome screening of selected regions  
701 was performed using XP-CLR, a likelihood method for detecting selective sweeps that is  
702 based on the multilocus allele frequency differentiation between two populations [21]. XP-  
703 CLR tests were run with a window size and step size of 1 Mb, with CatA set as the reference  
704 and compared to CatB and CatC for each chromosome. Invariant or singleton SNPs were  
705 excluded, leaving on average ~45% of available variants for the analysis.

706 A total of 69 regions, which were in the highest 95<sup>th</sup> ( $F_{ST}$ , ROD) or 99<sup>th</sup> (XP-CLR) percentile  
707 of all regions identified, were considered to be under selection. Within the identified 69  
708 regions under selection, 3,105 genetic variants were located within 922 genes. The 3,105  
709 genetic variants were used for VEP using the Ensembl Variant Effect Predictor toolset  
710 (Ensembl Variant Effect Predictor web interface, <http://www.ensembl.org/vep>). VEP was  
711 performed to determine the effect of the genetic variants on genes, transcripts, and protein  
712 sequence, as well as regulatory regions. SIFT was estimated to predict the effects of amino  
713 acid substitutions on protein function based on sequence homology and the physical  
714 properties of amino acids. The results were filtered for missense only with SIFT scores (SIFT  
715 score <0.05) from tolerant to deleterious. Regions of genetic differentiation between  
716 subpopulations and genes within these regions were identified based on  $F_{ST}$ ,  $\pi$ , ROD, and  
717 XP-CLR values of markers plotted linearly along each chromosome according to physical  
718 position. All visualizations were performed using the R packages yarr and ggplot2.

719

## 720 **Gene ontology and pathway enrichment analysis**

721 Gene ontology and pathway enrichment analysis of the 922 candidate genes under selection  
722 was performed as previously described [45]. Briefly, singular enrichment analysis (SEA) was  
723 performed using AgriGO v.2.0 [46] with the following parameter settings: Fisher's test, 0.05  
724 significance level, 5 minimum mapping entries, and complete gene ontology type.

725

## 726 **Association analysis**

727 GWASs were performed using TASSEL v.5.2.39 [40] and a total of 33,486 filtered genetic  
728 variants with <10% missing values and a MAF >1%. Different statistical models were used to  
729 calculate P-values for putative MTAs as follows, which included population structure to  
730 avoid spurious associations. For the 2015 and 2016 data, a compressed MLM with a  
731 population structure (Q) matrix (PCs) and kinship (K) matrix (matrix of genetic similarities  
732 based on simple matching coefficients) was used to correct for population structure as  
733 previously described [10]. According to the QQ plot, the MLM that incorporated Q and K  
734 was suitable for these datasets. Data from the 2015 and 2016 field trials were used in a  
735 previously published GWAS using only target-enrichment sequencing data (4,260 SNPs)  
736 [10]. For the 2017 data, GLMs with PCs as a correction for population structure were tested  
737 for all associations, which, according to the QQ plots, were suitable for this study. For all  
738 MTAs, multiple testing using Storey's q-value method [47] was performed to control for  
739 false discoveries and to assess statistical significance. As part of the q-value method, the  
740 smoother method, an extension of FDR correction, was employed. Lambda was set to 0,  
741 which estimates  $\pi_i(0) = 1$ , produces a list of significant tests equivalent to that obtained with  
742 the Benjamini and Hochberg [48] procedure, and is considered to be a conservative case of

743 Storey's q-value methodology. Only markers with a qFDR of <0.05 were considered to be  
744 significant. Manhattan plots were drawn with qman [49] v.0.1.4.

745 Broad-sense heritability ( $H^2$ ) was calculated using the following equation by treating  
746 genotype and environment as random effects, applying an MLM according to Equation 5:

$$747 \quad H^2 = \frac{\sigma_a^2}{\sigma_a^2 + \sigma_e^2} \quad (5)$$

748 where  $\sigma_a^2$  and  $\sigma_e^2$  represent the variance derived from genotypic and environmental effects,  
749 respectively.

750 MTAs were defined as 'robust' if they explained more than 5% of the phenotypic variation,  
751 'stable' if they were identified in more than one location, and 'consistent' if they were  
752 identified in more than one year. Phenogram [50] was used to produce the graphical genotype  
753 map in Fig 7.

754

## 755 **Acknowledgements**

756 We thank Ms Lee-Anne McFawn and Mr David Farleigh from DPIRD (South Perth, WA) for  
757 providing technical assistance in the field trials.

758

## 759 **References**

- 760 1. Van de Wouw M, Kik C, van Hintum T, van Treuren R, Visser B. Genetic erosion in  
761 crops: concept, research results and challenges. Plant Genet Resour. 2010;8: 1-15.
- 762 2. van de Wouw M, van Hintum T, Kik C, van Treuren R, Visser B. Genetic diversity trends  
763 in twentieth century crop cultivars: a meta analysis. Theor Appl Genet. 2010;120: 1241-52.



- 764 3. Dempewolf H, Baute G, Anderson J, Kilian B, Smith C, Guarino L. Past and future use of  
765 wild relatives in crop breeding. *Crop Sci.* 2017;57: 1070-1082.
- 766 4. Hill CB, Li C. Genetic architecture of flowering phenology in cereals and opportunities for  
767 crop improvement. *Front Plant Sci.* 2016;7: 1906.
- 768 5. Gandhi VP, Zhou Z. Food demand and the food security challenge with rapid economic  
769 growth in the emerging economies of India and China. *Food Res Int.* 2014;63: 108-124.
- 770 6. Colen L, Swinnen J. Economic growth, globalisation and beer consumption. *J Agricult*  
771 *Econ.* 2016;67: 186-207.
- 772 7. Mascher M, Gundlach H, Himmelbach A, Beier S, Twardziok SO, Wicker T, et al. A  
773 chromosome conformation capture ordered sequence of the barley genome. *Nature.*  
774 2017;544: 427-433.
- 775 8. Dreissig S, Mascher M, Heckmann S. Variation in recombination rate is shaped by  
776 domestication and environmental conditions in barley. *Mol Biol Evol.* 2019;36: 2029-2039.
- 777 9. Bustos-Korts D, Dawson IK, Russell J, Tondelli A, Guerra D, Ferrandi C, et al. Exome  
778 sequences and multi-environment field trials elucidate the genetic basis of adaptation in  
779 barley. *Plant J.* 2019;99: 1172-1191.
- 780 10. Hill CB, Angessa TT, McFawn LA, Wong D, Tibbits J, Zhang XQ, et al.  
781 Hybridisation-based target enrichment of phenology genes to dissect the genetic basis of  
782 yield and adaptation in barley. *Plant Biotechnol J.* 2019;17: 932-944.
- 783 11. Hill CB, Wong D, Tibbits J, Forrest K, Hayden M, Zhang XQ, et al. Targeted enrichment  
784 by solution-based hybrid capture to identify genetic sequence variants in barley. *Sci. Data*  
785 2019;6: 12.

- 786 12. He T, Hill CB, Angessa TT, Zhang XQ, Chen K, Moody D, et al. Gene-set association  
787 and epistatic analyses reveal complex gene interaction networks affecting flowering time in a  
788 worldwide barley collection. *J Exp Bot.* 2019;70: 5603-5616.
- 789 13. Merchuk-Ovnat L, Silberman R, Laiba E, Maurer A, Pillen K, Faigenboim A, et al.  
790 Genome scan identifies flowering-independent effects of barley HsDry2. 2 locus on yield  
791 traits under water deficit. *J Exp Bot.* 2018;69: 1765-1779.
- 792 14. Phan HT, Rybak K, Bertazzoni S, Furuki E, Dinglasan E, Hickey LT, et al. Novel sources  
793 of resistance to *Septoria nodorum* blotch in the Vavilov wheat collection identified by  
794 genome-wide association studies. *Theor Appl Genet.* 2018;131: 1223-1238.
- 795 15. Friedt W, Horsley RD, Harvey BL, Poulsen DME, Lance RCM, Ceccarelli S, et al.  
796 Barley Breeding History, Progress, Objectives, and Technology. In: Ullrich SE, editor.  
797 Barley: Production, Improvement, and Uses. New Jersey: Blackwell Publishing; 2011. pp.  
798 160-220.
- 799 16. Liu HJ, Yan J. Crop genome-wide association study: a harvest of biological relevance.  
800 *Plant J.* 2019; 97: 8-18.
- 801 17. Malysheva-Otto LV, Ganal MW, Röder MS. Analysis of molecular diversity, population  
802 structure and linkage disequilibrium in a worldwide survey of cultivated barley germplasm  
803 (*Hordeum vulgare* L.). *BMC Genet.* 2006;7: 6.
- 804 18. Komatsuda T, Pourkheirandish M, He C, Azhaguvel P, Kanamori H, Perovic D, et al.  
805 Six-rowed barley originated from a mutation in a homeodomain-leucine zipper I-class  
806 homeobox gene. *Proc Natl Acad Sci USA.* 2007;104: 1424-1429.

- 807 19. Alexander DH, Lange K. Enhancements to the ADMIXTURE algorithm for individual  
808 ancestry estimation. *BMC Bioinform.* 2011;12: 246.
- 809 20. Nei M, Li WH. Mathematical model for studying genetic variation in terms of restriction  
810 endonucleases. *Proc Natl Acad Sci USA.* 1979;76: 5269–5273.
- 811 21. Chen H, Patterson N, Reich D. Population differentiation as a test for selective sweeps.  
812 *Genome Res.* 2010;20: 393-402.
- 813 22. Alqudah AM, Schnurbusch T. Heading date is not flowering time in spring barley. *Front*  
814 *Plant Sci.* 2017;8: 896.
- 815 23. Jia Q, Li C, Shang Y, Zhu J, Hua W, Wang J, et al. Molecular characterization and  
816 functional analysis of barley semi-dwarf mutant Riso no. 9265. *BMC Genom.* 2015;16: 927.
- 817 24. Göransson M, Hallsson JH, Lillemo M, Orabi J, Backes G, Jahoor A, et al. Identification  
818 of ideal allele combinations for the adaptation of spring barley to Northern latitudes. *Front*  
819 *Plant Sci.* 2019;10: 542.
- 820 25. Voss-Fels KP, Stahl A, Wittkop B, Lichthardt C, Nagler S, Rose T, et al. Breeding  
821 improves wheat productivity under contrasting agrochemical input levels. *Nat Plants.* 2019;5:  
822 706-714.
- 823 26. Saisho D, Ishii M, Hori K, Sato K. Natural variation of barley vernalization requirements:  
824 implication of quantitative variation of winter growth habit as an adaptive trait in East Asia.  
825 *Plant Cell Physiol.* 2011;52: 775-784.
- 826 27. Wei J, Choi H, Jin P, Wu Y, Yoon J, Lee YS, et al. GL2-type homeobox gene *Roc4* in  
827 rice promotes flowering time preferentially under long days by repressing *Ghd7*. *Plant Sci.*  
828 2016;252: 133-143.

- 829 28. Mishra P, Panigrahi KC. GIGANTEA—an emerging story. *Front Plant Sci.* 2015;6: 8.
- 830 29. Zhang L, Wu XX, Wang J, Qi C, Wang X, Wang G, et al. BoALMT1, an Al-induced  
831 malate transporter in cabbage, enhances aluminum tolerance in *Arabidopsis thaliana*. *Front*  
832 *Plant Sci.* 2018;8: 2156.
- 833 30. Almagro L, Gómez Ros LV, Belchi-Navarro S, Bru R, Ros Barceló A, Pedreno MA.  
834 Class III peroxidases in plant defence reactions. *J Exp Bot.* 2008;60: 377-390.
- 835 31. Varshney RK, Thudi M, Roorkiwal M, He W, Upadhyaya HD, Yang W, et al.  
836 Resequencing of 429 chickpea accessions from 45 countries provides insights into genome  
837 diversity, domestication and agronomic traits. *Nat Genet.* 2019;51: 857-864.
- 838 32. Zadoks JC, Chang TT, Konzak CF. A decimal code for the growth stages of cereals.  
839 *Weed Res.* 1974;14: 415-421.
- 840 33. Li H, Durbin R. Fast and accurate long-read alignment with Burrows–Wheeler transform.  
841 *Bioinformatics.* 2010; 26: 589-595.
- 842 34. McKenna A, Hanna M, Banks E, Sivachenko A, Cibulskis K, Kernytsky A, et al. The  
843 Genome Analysis Toolkit: a MapReduce framework for analyzing next-generation DNA  
844 sequencing data. *Genome Res.* 2010;20: 1297-1303.
- 845 35. Akbari M, Wenzl P, Caig V, Carling J, Xia L, Yang S, et al. Diversity arrays technology  
846 (DArT) for high-throughput profiling of the hexaploid wheat genome. *Theor Appl Genet.*  
847 2006;113: 1409–1420.
- 848 36. Browning BL, Browning SR. Improving the accuracy and efficiency of identity-by-  
849 descent detection in population data. *Genetics.* 2013;194: 459–471.

- 850 37. Purcell S, Neale B, Todd-Brown K, Thomas L, Ferreira MA, Bender D, et al. PLINK: a  
851 tool set for whole-genome association and population-based linkage analyses. *Am J Hum*  
852 *Genet.* 2007;81: 559-575.
- 853 38. Jakobsson M, Rosenberg NA. CLUMPP: a cluster matching and permutation program for  
854 dealing with label switching and multimodality in analysis of population structure.  
855 *Bioinformatics.* 2007;23: 1801-1806.
- 856 39. Francis RM. pophelper: an R package and web app to analyse and visualize population  
857 structure. *Mol Ecol Res.* 2017;17: 27-32.
- 858 40. Bradbury PJ, Zhang Z, Kroon DE, Casstevens TM, Ramdoss Y, Buckler ES. TASSEL:  
859 software for association mapping of complex traits in diverse samples. *Bioinformatics.*  
860 2007;23: 2633-2007.
- 861 41. Han MV, Zmasek CM. phyloXML: XML for evolutionary biology and comparative  
862 genomics. *BMC Bioinform.* 2009;10: 356.
- 863 42. Weir BS. *Genetic Data Analysis II: Methods for Discrete Population Genetic Data.* 2nd  
864 ed. Sunderland: Sinauer Associates; 1996.
- 865 43. Danecek P, Auton A, Abecasis G, Albers CA, Banks E, DePristo MA, et al. The variant  
866 call format and VCFtools. *Bioinformatics.* 2011;27: 2156-2158.
- 867 44. Weir BS, Cockerham CC. Estimating  $F$ -statistics for the analysis of population structure.  
868 *Evolution.* 1984;38: 1358-1370.
- 869 45. Hill CB, Cassin A, Keeble-Gagnère G, Doblin MS, Bacic A, Roessner U. De novo  
870 transcriptome assembly and analysis of differentially expressed genes of two barley  
871 genotypes reveal root-zone-specific responses to salt exposure. *Sci. Reports.* 2016;6: 31558.

- 872 46. Tian T, Liu Y, Yan H, You Q, Yi X, Du Z, et al. agriGO v2. 0: a GO analysis toolkit for  
873 the agricultural community, 2017 update. *Nucleic Acids Res.* 2017;45: W122-W129.
- 874 47. Storey JD, Tibshirani R. Statistical significance for genomewide studies. *Proc Natl Acad*  
875 *Sci USA.* 2003;100: 9440-9445.
- 876 48. Benjamini Y, Hochberg Y. Controlling the false discovery rate: a practical and powerful  
877 approach to multiple testing. *J R Stat Soc Series B Stat Methodol.* 1995;57: 289-300.
- 878 49. Turner SD. qqman: an R package for visualizing GWAS results using Q-Q and manhattan  
879 plots. *J Open Source Softw.* 2014;3: 731.
- 880 50. Wolfe D, Dudek S, Ritchie MD, Pendergrass SA. Visualizing genomic information across  
881 chromosomes with PhenoGram. *BioData Min.* 2013;6: 18.

882

### 883 **Supporting Information captions**

884 **S1 Fig. Barley genotype panel.** The barley diversity panel consists of 632 genotypes sourced  
885 worldwide a), with genotypes separated by b) continents of origin (Africa, North America,  
886 South America, Asia, Europe and Australia), c) row type, and d) growth habit. Insert figure  
887 within b): Historical categories are presented for Australian cultivars only (Cat A: historic  
888 cultivars, released prior to 1999; Cat B: modern cultivars, released between 1999 and 2005;  
889 Cat C: recent cultivars, released between 2006 and 2019; and Cat D: breeding and research  
890 lines).

891 **S2 Fig. Distribution of genetic variant density on seven chromosomes.** Number of genetic  
892 variants (y-axis) for the seven chromosomal groups over 10 Mb sliding windows (x-axis).

893 **S3 Fig. Graphical genotype map of genetic variants detected using different genotyping**  
894 **technologies.** Genetic markers detected via a) low-coverage whole genome sequencing, b)

895 Genotyping-by-sequencing (GBS) by Diversity Arrays Technology sequencing (DArT-Seq),  
896 c) target capture sequencing, and d) all genetic markers combined (a- c). Plots drawn using  
897 the PhenoGram online software tool. Cat C: recent cultivars, released between 2006 and  
898 2019; and Cat D: breeding and research lines).

899 **S4 Fig. Exploration of the optimal number of genetic subpopulations (K) using  $\Delta$  cross-**  
900 **validation error and standard error values in the barley germplasm collection.** A solid  
901 line denotes the choice of K=12 which represents the most likely number of subpopulations  
902 within the barley germplasm collection.

903 **S5 Fig. Plot of ancestry estimates inferred by ADMIXTURE for 632 worldwide barley**  
904 **accessions.** Each colour represents a population, and the colour of individual haplotypes  
905 represents their proportional membership in the different populations. Membership  
906 coefficients for each population were merged across 100 replicate runs using the CLUMPP  
907 programme. The number of clusters (K) present in the entire population of 632 accessions  
908 was judged to be K = 12 based on the CV error. Shown are clusters 2, 4, 6, 8, 10, and 12.

909 **S6 Fig. Neighbour-joining trees of 47 selected Australian barley cultivars.** Each colour  
910 represents a different historic group as per legend. The tree was constructed from simple  
911 matching distance of 33,486 common genetic variants in the selected barley cultivars.

912 **S7 Fig. Principal component analysis (PCA) of the first two components of 632 barley**  
913 **varieties.** a) PCA based on geographic region: The seven divergence groups are coloured  
914 respectively; b) PCA based on growth habit: The three divergence groups are coloured  
915 respectively; c) PCA based on row type: The two divergence groups are coloured  
916 respectively. PC1 and PC2 together explain about 54% of the total variation, and partitioned  
917 the population into distinct clusters.

918 **S8 Fig. The extent of Linkage Disequilibrium (LD) across the seven chromosomes in a**  
919 **worldwide collection of domesticated barley varieties.** Values are intra-chromosomal LD  
920  $r^2$  values for all intra-chromosomal pairs of genetic variants binned by distance. Curves were  
921 fitted by second-degree LOESS curve.

922 **S9 Fig. Chromosomal distribution of nucleotide diversity ( $\pi$ ) between different historic**  
923 **groups of domesticated Australian barley genotypes.** Statistics based on 10 Mb windows.  
924 A legend is provided at the top of the figure. CatA: Cultivars released between 1903 and  
925 1998; CatB: Cultivars released between 1999 and 2005; CatC: Cultivars released between  
926 2006 and 2019.

927 **S10 Fig. Chromosomal distribution of nucleotide diversity ( $\pi$ ) between different**  
928 **geographic groups of the barley diversity panel.** Statistics based on 10 Mb windows. A  
929 legend is provided at the top of the figure.

930 **S11 Fig. Chromosomal distribution of Tajima's D values between different historic**  
931 **groups of domesticated Australian barley genotypes.** Statistics based on 10 Mb windows.  
932 Filled circles show values above the 99th percentile and are colour-coded according to the  
933 different historic groups. A legend is provided at the top of the figure. CatA: Cultivars  
934 released between 1903 and 1998; CatB: Cultivars released between 1999 and 2005; CatC:  
935 Cultivars released between 2006 and 2019. CatD: unreleased breeding and research lines.  
936 legend is provided at the top of the figure.

937 **S12 Fig. Chromosomal distribution of Tajima's D values between different geographic**  
938 **groups of the barley diversity panel. Statistics based on 10 Mb windows.** Filled circles  
939 show values above the 99th percentile and are colour-coded according to the different  
940 geographic groups. A legend is provided at the top of the figure.



941 **S13 Fig. Chromosomal distribution of Fixation Index (FST) values and XP-CLR scores**  
942 **between different historic groups of domesticated Australian barley genotypes.**

943 Highlighted regions (triangles coloured as per legend) are based on the 99th percentile (XP-  
944 CLR). Statistics based on 10 Mb windows. A legend is provided at the top of the figure.

945 CatA: Cultivars released between 1903 and 1998; CatB: Cultivars released between 1999 and  
946 2005; CatC: Cultivars released between 2006 and 2019.

947 **S14 Fig. Chromosomal distribution of Reduction of Diversity (ROD) values between**  
948 **CatA and CatB historic groups of domesticated Australian barley genotypes.** Statistics

949 based on 10 Mb windows. A legend is provided at the top of the figure. CatA: Cultivars  
950 released between 1903 and 1998; CatB: Cultivars released between 1999 and 2005.

951 2005; CatC: Cultivars released between 2006 and 2019.

952 **S15 Fig. Chromosomal distribution of Reduction of Diversity (ROD) values between**  
953 **CatA and CatC historic groups of domesticated Australian barley genotypes.** Statistics

954 based on 10 Mb windows. A legend is provided at the top of the figure. CatA: Cultivars  
955 released between 1903 and 1998; CatC: Cultivars released between 2006 and 2019.

956 **S16 Fig. Significantly enriched GO terms related to molecular function in genes within**  
957 **candidate regions under selection.** Gene Ontology (GO) and Pathway enrichment analysis

958 performed with AgriGO v.2.0 using Fisher test, 0.05 significance level, 5 minimum mapping  
959 entries and Complete GO gene ontology type. Full datasets are available in S9 File.

960 **S17 Fig. Consequences of genetic polymorphisms identified in candidate regions under**  
961 **selection and categorized by Ensembl Variant Effect Predictor.** A total of 3,105 genetic

962 variants are categorized and percentages of potential consequences are provided in a) for all  
963 consequences, and b) for consequences in coding regions only. See Ensembl Variant

964 documentation for explanation of consequence categories

965 ([http://www.ensembl.org/info/genome/variation/predicted\\_data.html#consequences](http://www.ensembl.org/info/genome/variation/predicted_data.html#consequences)).

966 **S18 Fig. Manhattan and QQ plots of flowering time for all field trials with significant**

967 **marker-trait associations.** Days to ZS49 were used as an equivalent to flowering time (FT).

968 Left panel: Manhattan plots, right panel: Quantile–quantile (QQ) plots. GWAS results are

969 presented by negative  $\log_{10}$  of unadjusted p-values against position on each of the seven

970 chromosomes. Horizontal dashed lines indicate the genome-wide significant threshold

971 selected by local false discovery rate and a q-value cut-off at 0.05 (blue) and 0.01 (red).

972 **S19 Fig. Manhattan and QQ plots of grain yield for all field trials with significant**

973 **marker-trait associations.** Other details as per legend to S18 Fig.

974 **S20 Fig. Manhattan and QQ plots of plant height for all field trials with significant**

975 **marker-trait associations.** Other details as per legend to S18 Fig.

976 **S21 Fig. Graphical genotype map of selected genetic variants including significant p-**

977 **values and marker  $r^2$  values associated with three agronomic traits.** Significant genetic

978 variants detected via GWAS for a) flowering time (measured as Days to ZS49), b) grain

979 yield, and c) plant height. Only stable, consistent and/or robust markers are shown (S15 File).

980 **S1 Table. Barley genetic variants.** Sequencing of the 632 genotypes delivered 33,486

981 filtered genetic markers detailed in the current table with the number of variants (SNPs and

982 InDels) from low-coverage whole genome sequencing (LC), target capture sequencing (TC),

983 and DArTseq (DArT), the number of genic and non-genic variants and associated ratio

984 (genic/non-genic) with the number of targeted genes per chromosomes. ‘Genic variants’

985 columns count include those associated with a high confidence annotation<sup>7</sup>. ‘Genes’ column

986 includes genes with high-confidence annotation. ‘Non-genic’ variants include both

987 ‘Upstream’ and ‘Downstream’ variants as well as variants without associated high-  
988 confidence annotation.

989 **S2 Table. Nucleotide diversity index ( $\pi$ ) and Tajima’s D summary statistics of the**  
990 **genetic variation observed within different subpopulations in the barley diversity panel.**

991 CatA: Cultivars released between 1903 and 1998; CatB: Cultivars released between 1999 and  
992 2005; CatC: Cultivars released between 2006 and 2019.

993 **S3 Table. FST summary statistics in the genetic variation observed between different**  
994 **subpopulations in the barley diversity panel.** CatA: Cultivars released between 1903 and

995 1998; CatB: Cultivars released between 1999 and 2005; CatC: Cultivars released between  
996 2006 and 2019.

997 **S4 Table. Allele frequency of missense genetic variants in phenology-gene related**  
998 **candidate genomic regions that underwent selection during breeding of in Australian**  
999 **barley cultivars.** Most phenology-gene related candidate genomic regions were part of

1000 previously published targeted phenology gene re-sequencing performed on the same barley

1001 cultivars<sup>10,11</sup>. Shown are only variants within phenology-gene related gene regions

1002 (including 500bp flanking regions) and with >20% allele frequency (freq.) difference

1003 between CatA, CatB, and CatC barley cultivars. TF: transcription factor. CatA: Cultivars

1004 released between 1903 and 1998; CatB: Cultivars released between 1999 and 2005; CatC:

1005 Cultivars released between 2006 and 2019.

1006 **S5 Table. Allele frequency of missense genetic variants in candidate genomic regions**

1007 **that underwent selection during breeding of in Australian barley cultivars.** Shown are

1008 only variants with >20% allele frequency (freq.) difference of all missense variants between

1009 CatA, CatB, and CatC barley cultivars. All candidate genomic regions are located on

1010 chromosome 7H. CatA: Cultivars released between 1903 and 1998; CatB: Cultivars released  
1011 between 1999 and 2005; CatC: Cultivars released between 2006 and 2019.

1012 **S1 File. List of barley genotypes.** The barley diversity panel consists of 632 genotypes  
1013 sourced worldwide.

1014 **S2 File. Genome-wide Linkage Disequilibrium (LD) decay for all barley genotypes.**  
1015 Values are mean and median LD  $r^2$  values for all pairs of genetic variants binned by distance  
1016 (100kb).

1017 **S3 File. Genome-wide Linkage Disequilibrium (LD) decay for Australian barley**  
1018 **cultivars released between 1903 and 1998 (CatA).** Values are mean and median LD  $r^2$   
1019 values for all pairs of genetic variants binned by distance (100kb).

1020 **S4 File. Genome-wide Linkage Disequilibrium (LD) decay for Australian barley**  
1021 **cultivars released between 1999 and 2005 (CatB).** Values are mean and median LD  $r^2$   
1022 values for all pairs of genetic variants binned by distance (100kb).

1023 **S5 File. Genome-wide Linkage Disequilibrium (LD) decay for Australian barley**  
1024 **cultivars released between 2006 and 2019 (CatC).** Values are mean and median LD  $r^2$   
1025 values for all pairs of genetic variants binned by distance (100kb).

1026 **S6 File. Genome-wide Linkage Disequilibrium (LD) decay for Australian barley**  
1027 **breeding and research lines (CatD).** Values are mean and median LD  $r^2$  values for all pairs  
1028 of genetic variants binned by distance (100kb).

1029 **S7 File. Selected candidate regions from comparisons of Australian barley cultivars**  
1030 **released between 1903 and 2019.** There are 69 selected regions from comparing CatA  
1031 with CatB and CatC, respectively, and 924 candidate genes falling within the regions. CatA:  
1032 Cultivars released between 1903 and 1998; CatB: Cultivars released between 1999 and 2005;

1033 CatC: Cultivars released between 2006 and 2019. Region ID: The identifier of a selected  
1034 region; Region Coordinate: The range of the selected region;  $F_{ST}$  (CatA-CatB): Fixation  
1035 Index ( $F_{ST}$ ) values among CatA and CatB barley historic groups in the candidate region.  
1036 Highlighted regions are above the 95<sup>th</sup> percentile.  $F_{ST}$  (CatA-CatC): Fixation Index (FST)  
1037 values among CatA and CatC barley historic groups in the candidate region. Highlighted  
1038 regions are above the 95<sup>th</sup> percentile. ROD (CatA-CatB): Reduction Of Diversity (ROD)  
1039 values among CatA and CatB barley historic groups in the candidate region. Highlighted  
1040 regions are above the 95<sup>th</sup> percentile. ROD (CatA-CatC): Reduction Of Diversity (ROD)  
1041 values among CatA and CatC barley historic groups in the candidate region. Highlighted  
1042 regions are above the 95<sup>th</sup> percentile. XP-CLR (CatA-CatB): Cross-Population Composite  
1043 Likelihood Ratio Test (XP-CLR) values among CatA and CatB barley historic groups in the  
1044 candidate region. Highlighted regions are above the 99<sup>th</sup> percentile. XP-CLR (CatA-CatC):  
1045 Cross-Population Composite Likelihood Ratio Test (XP-CLR) values among CatA and CatC  
1046 barley historic groups in the candidate region. Highlighted regions are above the 99<sup>th</sup>  
1047 percentile.

1048 **S8 File. Candidate genes within selected candidate regions from comparisons of**  
1049 **Australian barley cultivars released between 1903 and 2019.** There are 69 selected regions  
1050 from comparing CatA with CatB and CatC, respectively, and 924 candidate genes falling  
1051 within the regions. Of these, 890 have gene-stable ID's and additional information is provided  
1052 in this dataset. CatA: Cultivars released between 1903 and 1998; CatB: Cultivars released  
1053 between 1999 and 2005; CatC: Cultivars released between 2006 and 2019. Gene ID: The  
1054 candidate gene locus from barley annotation of IBSC v2 [4]; Gene Type: A gene  
1055 classification; Gene Coordinate: The range of the gene from annotation; Functional  
1056 Annotation: Annotation from IBSC v2, Gene name (TC): Abbreviated name given for genes  
1057 selected and sequenced in the targeted re-sequencing (TC) phenology gene project [10,11].

1058 **S9 File. Gene Ontology and pathway enrichment analysis for candidate genes under**

1059 **selection in Australian barleys.** Singular Enrichment Analysis (SEA) was performed using

1060 AgriGO v.2.0 using Fisher test, 0.05 significance level, 5 minimum mapping entries and

1061 Complete GO gene ontology type.

1062 **S10 File. Variant Effect Predictor analysis for candidate genes under selection.** Variant

1063 Effect Prediction (VEP) was performed using ensembl (McLaren et al., 2016) for candidate

1064 genes potentially under selection. Shown are results for missense only with Sorting Intolerant

1065 From Tolerated (SIFT) scores.

1066 **S11 File. Descriptive statistics for all investigated traits in the field trials.** Minimal (Min)

1067 and Maximal (Max) values are shown next to the arithmetic mean (Mean), Standard deviation

1068 (SD) and coefficient of variation (CV). H<sup>2</sup>: Broad-sense heritability. N: Number of lines

1069 scored successfully in the field trial. \*Plant development measured on 2 Oct as an estimation

1070 to ZS49. Esperance (1): Esperance field trial location 1. Esperance (2): Esperance field trial

1071 location 2 (EDRS). Merredin (1): non-irrigated. Merredin (2): irrigated. Perth (1): Perth, time

1072 of sowing 1 (early). Perth (2): Perth, time of sowing 2 (mid). Perth (3): Perth, time of sowing

1073 3 (late).

1074 **S12 File. Z scores for all barley varieties and investigated traits in the field trials.** The

1075 critical Z score values for a 95% confidence level were -1.96 and +1.96 standard deviations,

1076 equal to a P-value of 0.05. Genotype trait characteristics were defined as ‘robust’ if they were

1077 consistently below or above the population mean across one location (same value direction),

1078 ‘stable’ if they were significant (less than -1.96 or more than +1.96 standard deviations) for

1079 more than one location, and ‘consistent’ if they were significant (less than -1.96 or more than

1080 +1.96 standard deviations) across at least two years at one location or more. \*Plant

1081 development measured on 2 Oct as an estimation to ZS49. Esperance (1): Esperance field

1082 trial location 1. Esperance (2): Esperance field trial location 2 (EDRS). Merredin (1): non-  
1083 irrigated. Merredin (2): irrigated. Perth (1): Perth, time of sowing 1 (early). Perth (2): Perth,  
1084 time of sowing 2 (mid). Perth (3): Perth, time of sowing 3 (late).

1085 **S13 File. Significant marker-trait associations for flowering time (FT, Days to ZS49)**

1086 **identified via genome-wide association mapping for all studied agronomic traits.** MAF:

1087 Minor allele frequency. R2: Contribution to phenotypic variation. P-value: Adjusted p-value  
1088 after multiple comparisons false discovery rate testing using Storey's qvalue (Storey, 2002).

1089 Esperance (1): Esperance field trial location 1. Esperance (2): Esperance field trial location 2  
1090 (EDRS). Merredin (1): non-irrigated. Merredin (2): irrigated. Perth (1): Perth, time of sowing  
1091 1 (early). Perth (2): Perth, time of sowing 2 (mid). Perth (3): Perth, time of sowing 3 (late).

1092 Stable: Marker-trait association (MTA) detected at more than one location. Consistent: MTA  
1093 detected for more than one year at the same location. Robust: More than 5% phenotypic  
1094 variation explained.

1095 **S14 File. Significant marker-trait associations for grain yield identified via genome-wide**

1096 **association mapping for all studied agronomic traits.** MAF: Minor allele frequency. R2:

1097 Contribution to phenotypic variation. P-value: Adjusted p-value after multiple comparisons  
1098 false discovery rate testing using Storey's qvalue (Storey, 2002). Esperance (1): Esperance

1099 field trial location 1. Merredin (1): non-irrigated. Stable: Marker-trait association (MTA)  
1100 detected at more than one location. Consistent: MTA detected for more than one year at the  
1101 same location. Robust: More than 5% phenotypic variation explained.

1102 **S15 File. Significant marker-trait associations for plant height identified via genome-**

1103 **wide association mapping for all studied agronomic traits.** MAF: Minor allele frequency.

1104 R2: Contribution to phenotypic variation. P-value: Adjusted p-value after multiple

1105 comparisons false discovery rate testing using Storey's qvalue (Storey, 2002). Esperance (1):

1106 Esperance field trial location 1. Merredin (1): non-irrigated. Stable: Marker-trait association  
1107 (MTA) detected at more than one location. Consistent: MTA detected for more than one year  
1108 at the same location. Robust: More than 5% phenotypic variation explained

1109

## 1110 **Figure legends**

1111 **Figure 1: Population structure of the global barley panel.** a) Population structure of the  
1112 entire barley panel was inferred by assuming twelve subpopulations (K) (**Supplemental**  
1113 **Figure 4**). Each colour represents a different subpopulation as per the legend. Distribution of  
1114 ADMIXTURE-defined populations based on b) seven geographical locations, c) three growth  
1115 habits, and d) two row types. The neighbour-joining trees of 632 barley genotypes with clusters  
1116 highlighted are based on e) geographic location or f) growth habit. The trees were constructed  
1117 from simple matching distances of 33,486 common genetic variants in the barley population.  
1118 Fac., facultative.

1119

1120 **Figure 2: Genome-wide linkage disequilibrium (LD) decay in different historical groups**  
1121 **of domesticated Australian barley genotypes.** Values are reported as mean LD  $r^2$  for all  
1122 pairs of genetic variants binned by distance (100 kb). Curves were fitted by a LOESS  
1123 function. CatA: Cultivars released between 1903 and 1998, CatB: cultivars released between  
1124 1999 and 2005, CatC: cultivars released between 2006 and 2019, Cat D: breeding and  
1125 research lines, Total: total barley population of 632 varieties.

1126 **Figure 3: Genetic diversity and selection (breeding) signatures of different groups of**  
1127 **domesticated barley genotypes.** a) Plots of nucleotide diversity index ( $\pi$ ) values and b)  
1128 Tajima's D values to compare the average number of pairwise differences and the number of  
1129 segregating sites between samples within each of our geographic and historical



1130 subpopulations in Australia (highlighted in light grey shading; a timescale is provided above  
1131 the panel). Solid thin black horizontal lines indicate means, transparent horizontal bands of  
1132 different colours indicate Bayesian 95% highest-density intervals (HDIs), black dots  
1133 represent individual data points, full densities are shown as bean plots. c) Tajima's D  
1134 distribution among the different historical groups of domesticated Australian barley  
1135 genotypes and d) barley varieties from different geographic regions. Filled circles show  
1136 values above the 99<sup>th</sup> percentile and are colour coded according to the different historical or  
1137 geographic groups as indicated in the legends within the panels. Boxes point to data points  
1138 above the 99<sup>th</sup> percentile that are located within phenology-related genes. Details are further  
1139 described in the figure. All statistics are based on 10-Mb windows. CatA: Cultivars released  
1140 between 1903 and 1998; CatB: cultivars released between 1999 and 2005; CatC: cultivars  
1141 released between 2006 and 2019; Cat D: breeding and research lines.

1142

1143 **Figure 4: Breeding selection signatures of domesticated Australian barley genotypes. a)**

1144 Pirate plot of the genetic differentiation fixation index ( $F_{ST}$ ) values between different historical  
1145 groups of domesticated Australian barley genotypes (a timescale from 1903 to 2019 is provided  
1146 above the panel). Solid thin black lines indicate means, black horizontal bands indicate  
1147 Bayesian 95% highest-density intervals (HDIs), black dots represent individual data points, full  
1148 densities are shown as bean plots. b)  $F_{ST}$  values and cross-population composite likelihood ratio  
1149 (XP-CLR) test scores for CatA, CatB, and CatC historical barley groups on each chromosome  
1150 (Chr.), illustrating the range of variation in diversity between these groups. c) Reduction of  
1151 Diversity (ROD) distribution between the CatA and CatB historical barley, and d) distribution  
1152 between the CatA and CatC historical barley groups. Highlighted regions (as per the legend for  
1153 b and yellow bars for c and d) are above the 95<sup>th</sup> percentile ( $F_{ST}$  and ROD), or above the 99<sup>th</sup>  
1154 percentile (XP-CLR). Boxes indicate regions located within phenology-related genes, with

1155 details further described in the figure. All statistics are based on 10-Mb windows. CatA:  
1156 Cultivars released between 1903 and 1998, CatB: cultivars released between 1999 and 2005,  
1157 CatC: cultivars released between 2006 and 2019.

1158 **Figure 5: Graphical genotype map of selected genetic variants associated with three**  
1159 **agronomic traits.** Significant genetic variants detected via genome-wide association studies  
1160 for flowering time (FT, measured as days to Zadoks stage 49 [ZS49]), grain yield (GY), and  
1161 plant height (PH). Only stable, consistent, and/or robust markers are shown (Supplemental  
1162 Files 13–15). Selected genetic variants (consistent and/or robust markers) that also fall within  
1163 candidate regions for breeding selection are marked with orange asterisks. Plots drawn using  
1164 the PhenoGram software tool.

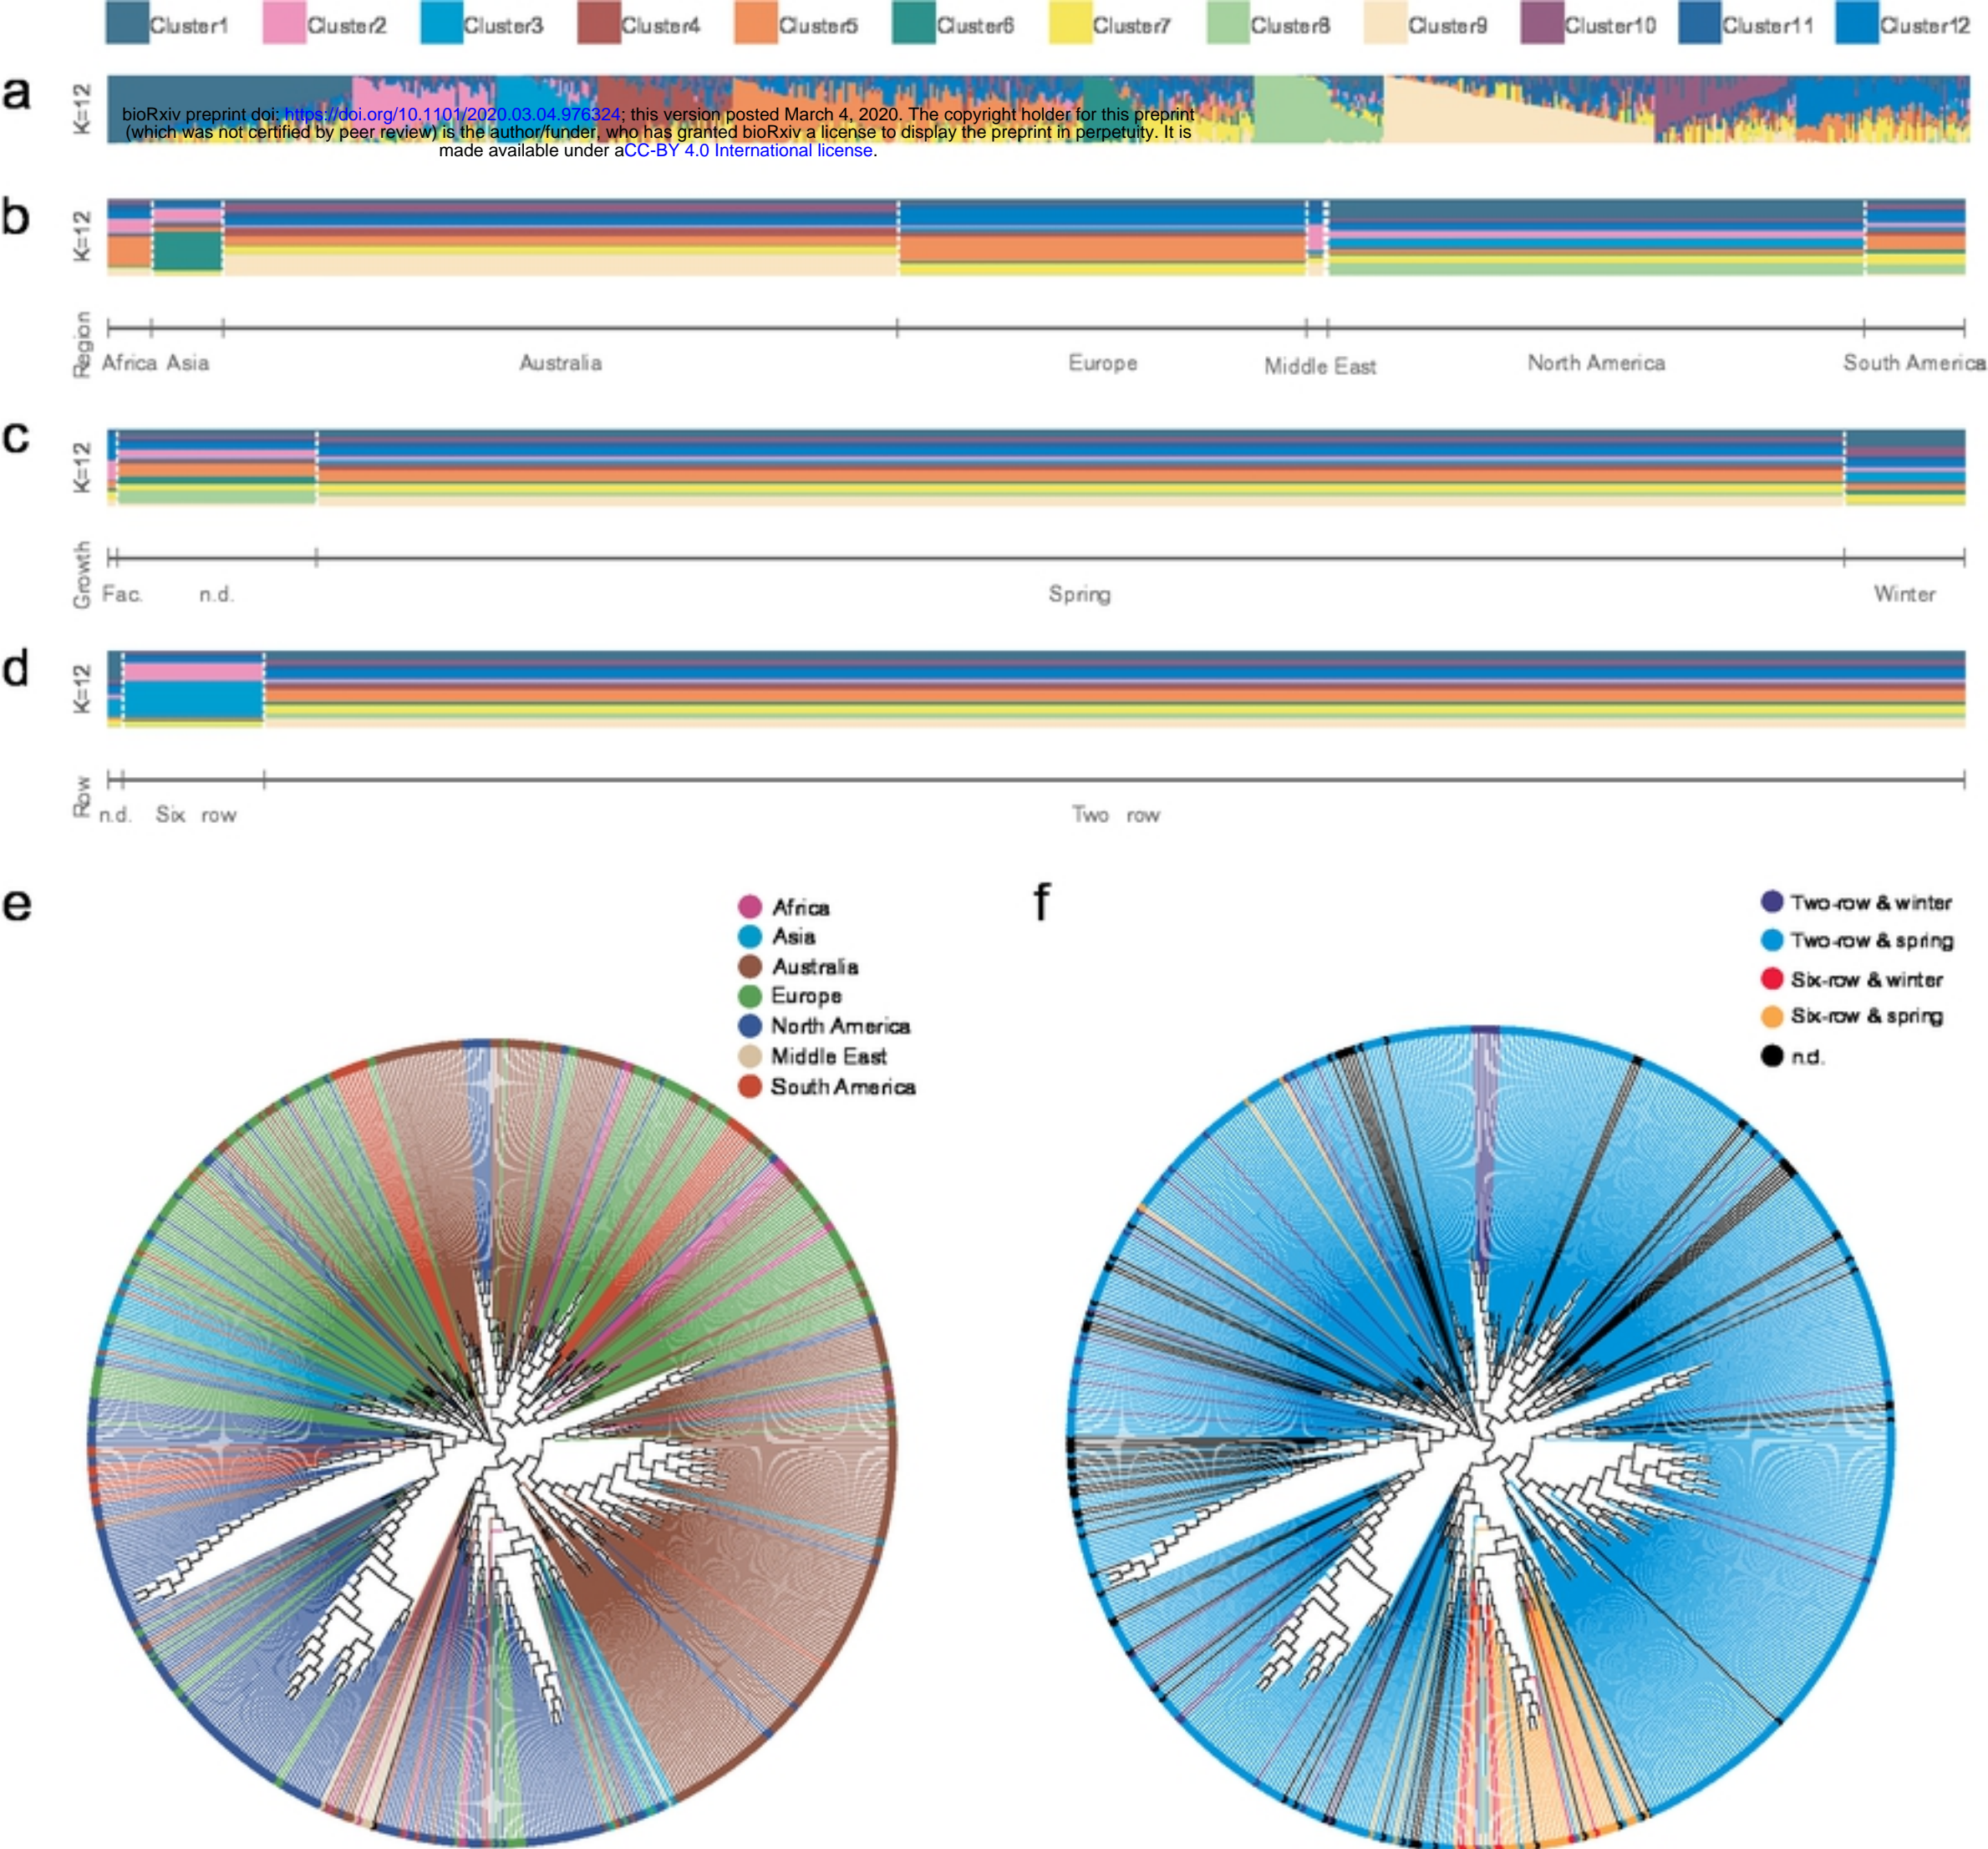

Figure 1



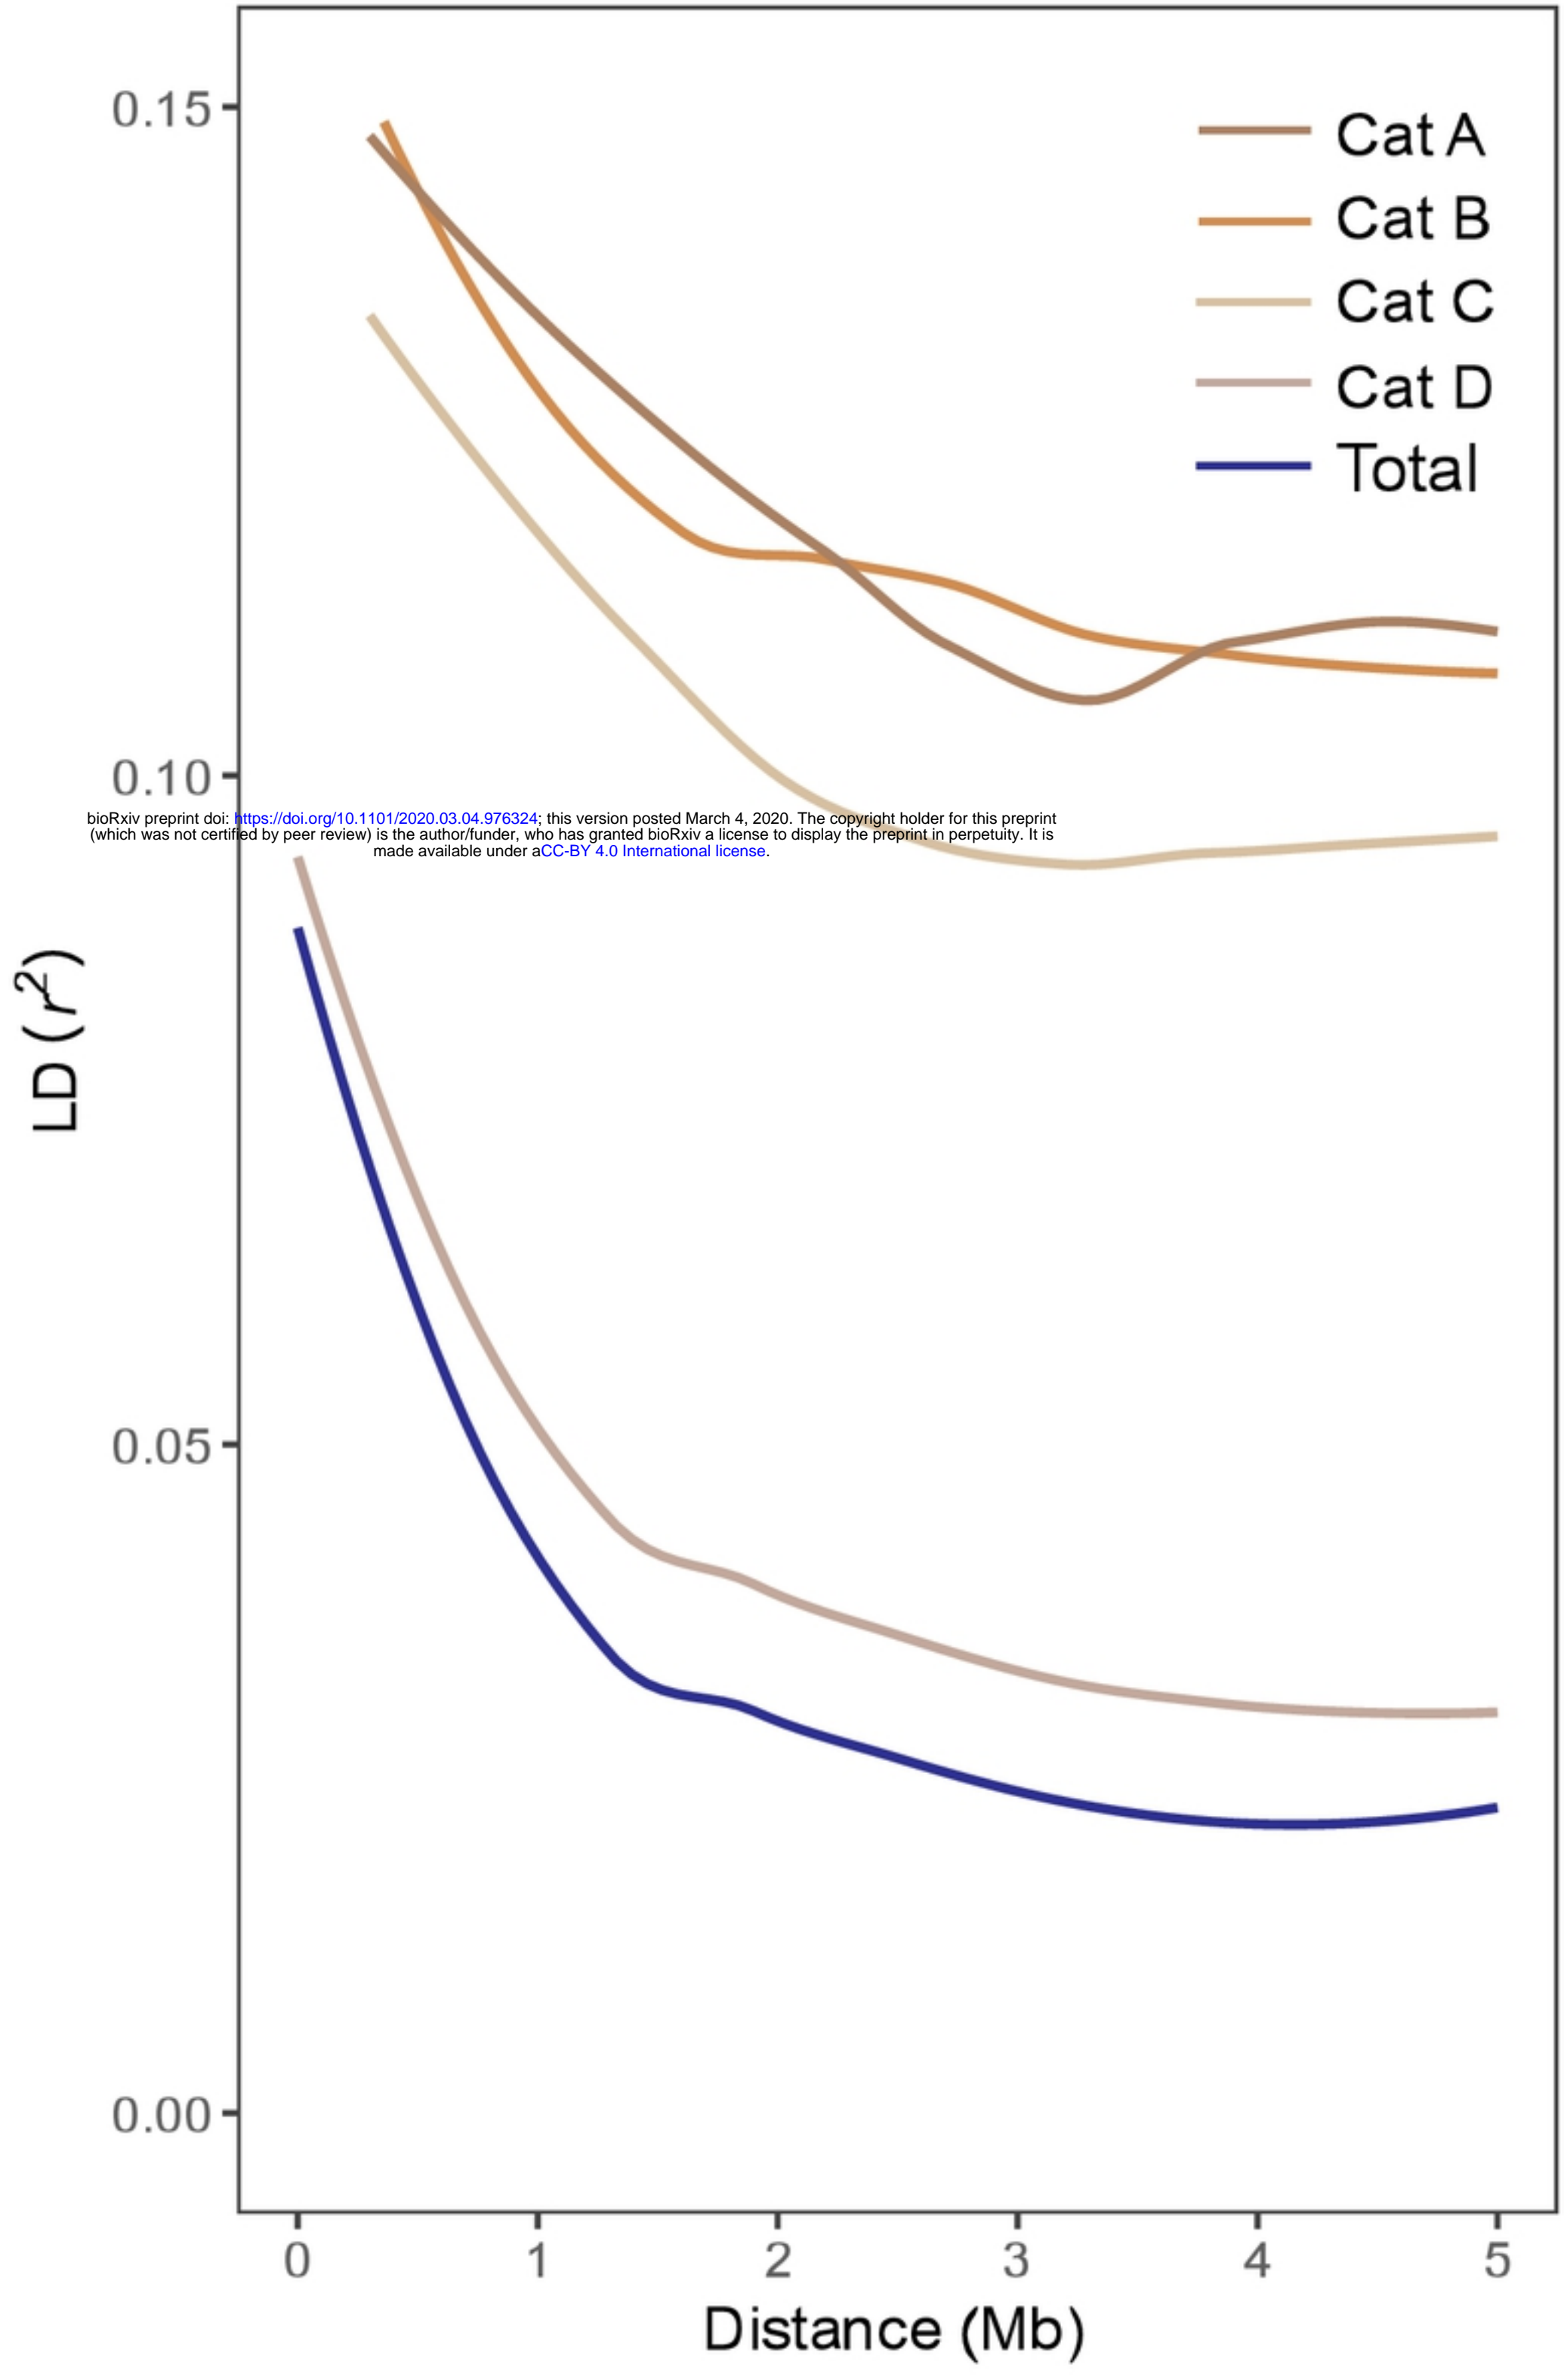

bioRxiv preprint doi: <https://doi.org/10.1101/2020.03.04.976324>; this version posted March 4, 2020. The copyright holder for this preprint (which was not certified by peer review) is the author/funder, who has granted bioRxiv a license to display the preprint in perpetuity. It is made available under aCC-BY 4.0 International license.

Figure 2

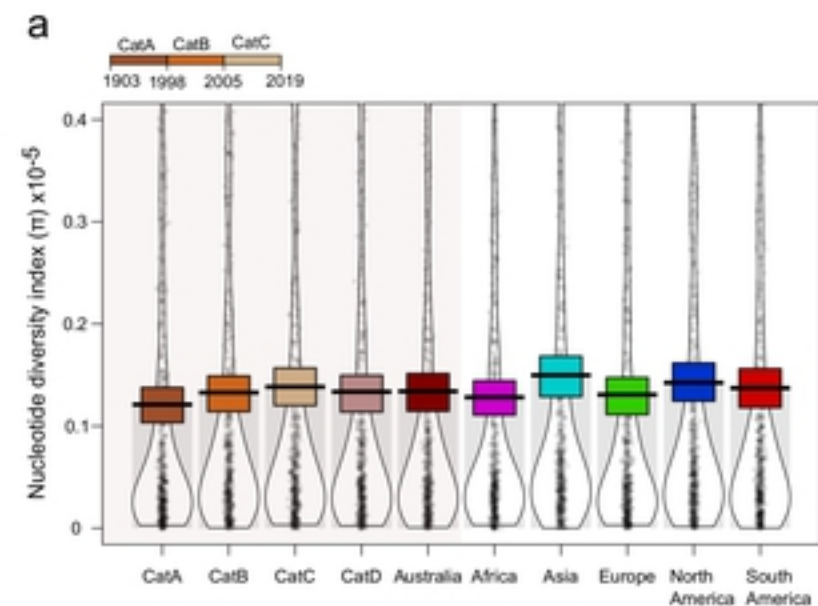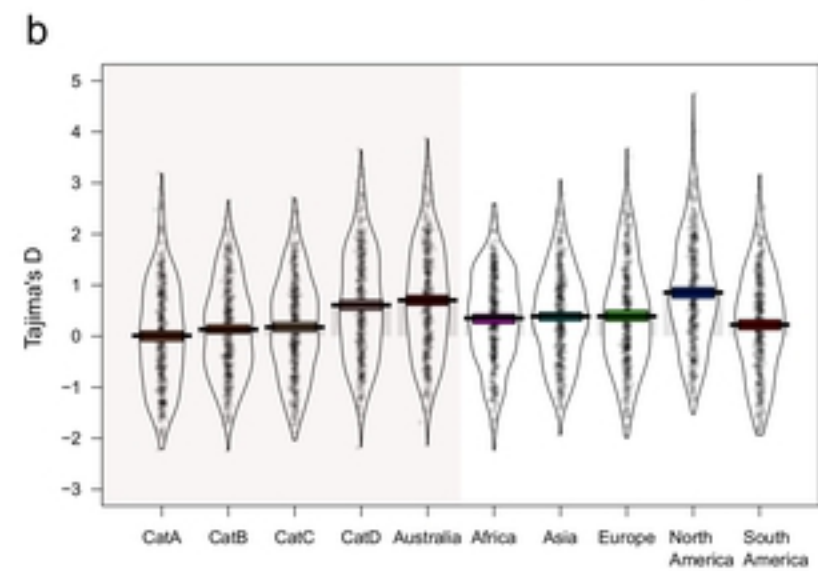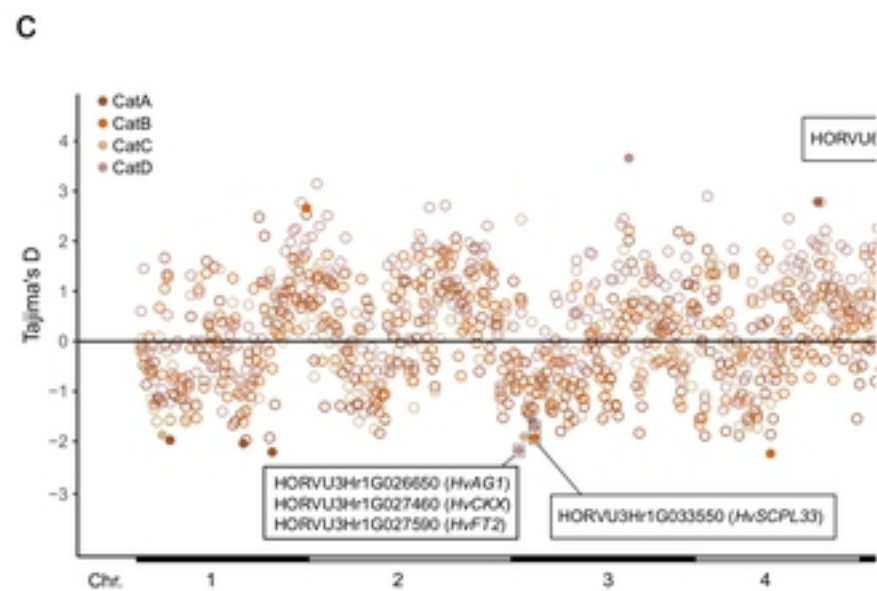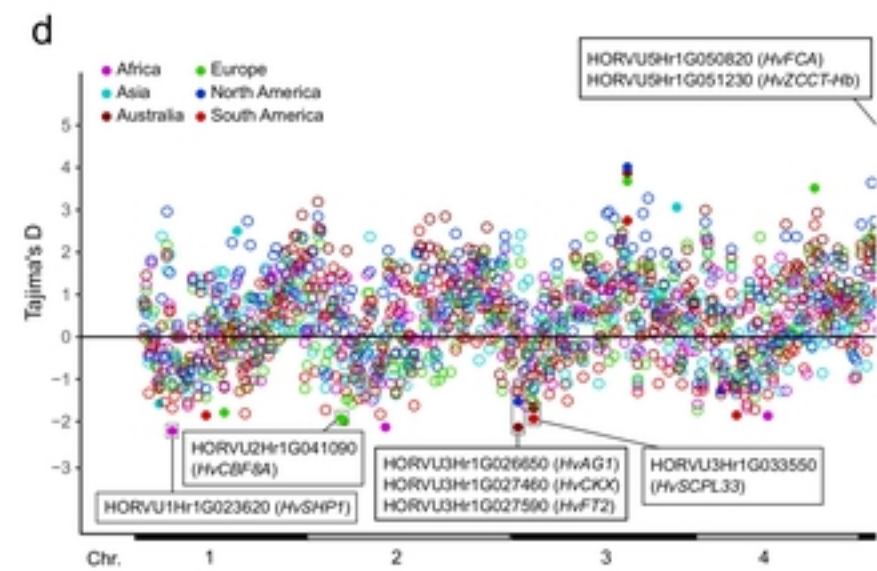

Figure 3

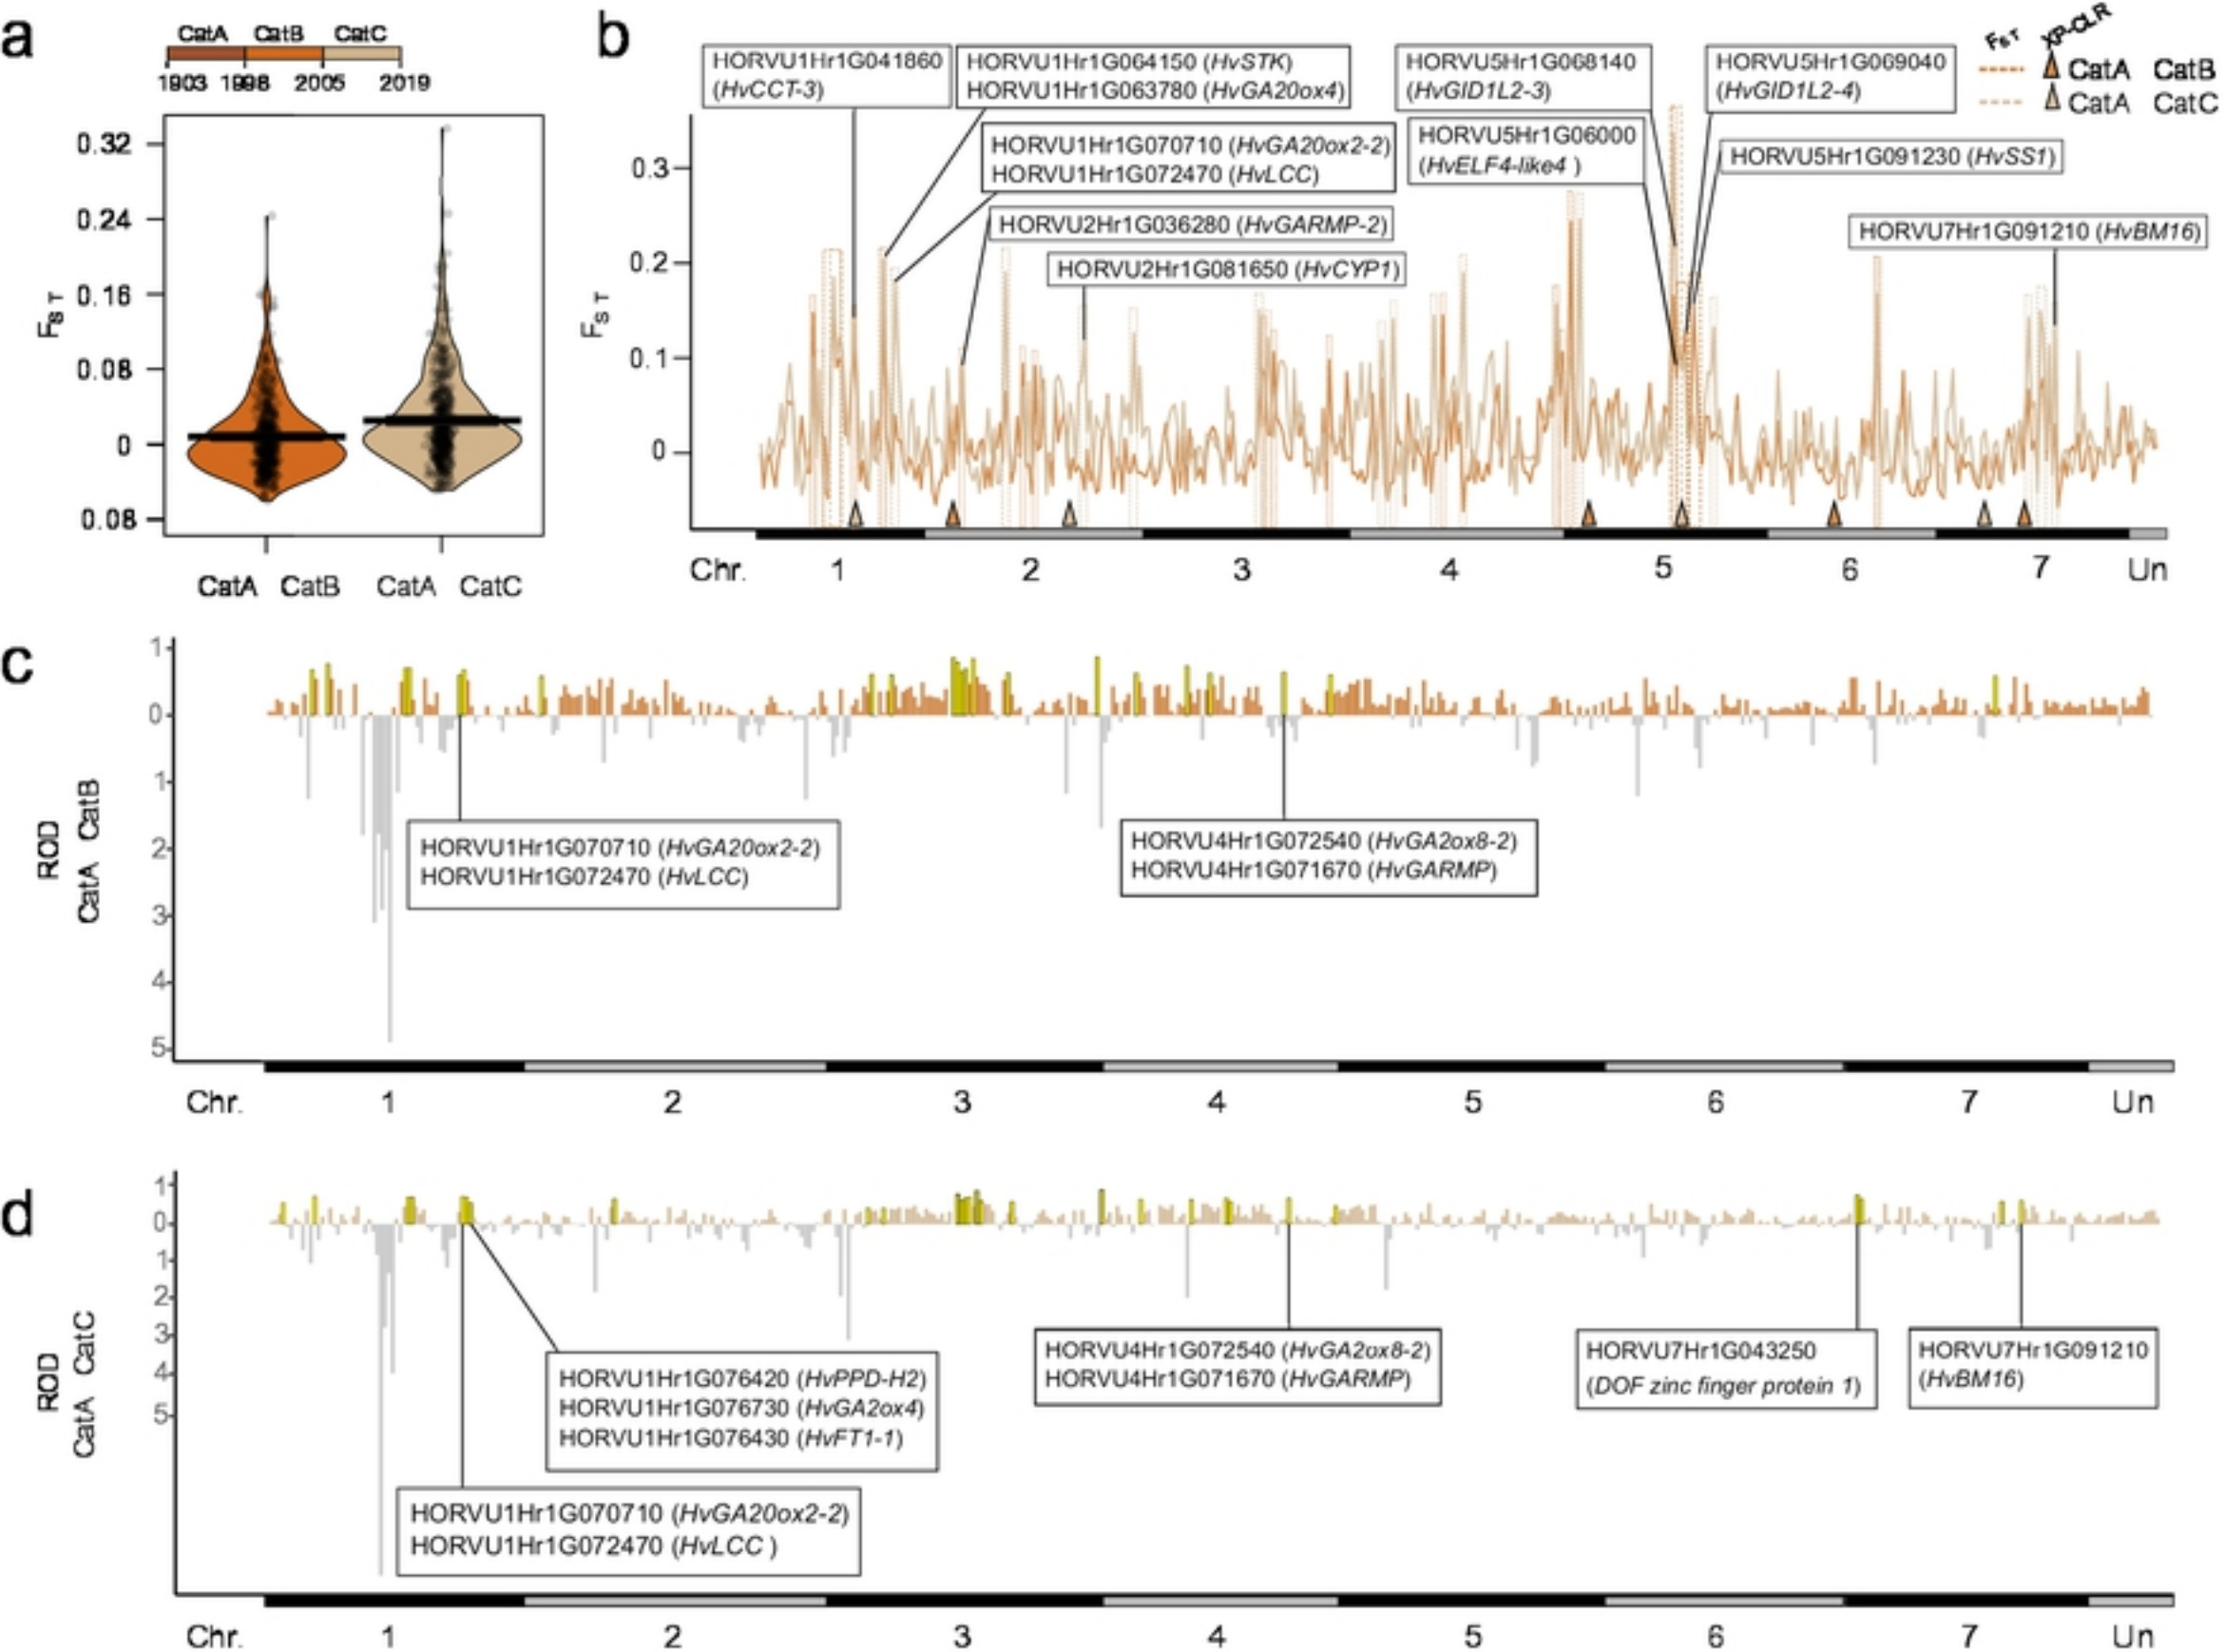

Figure 4

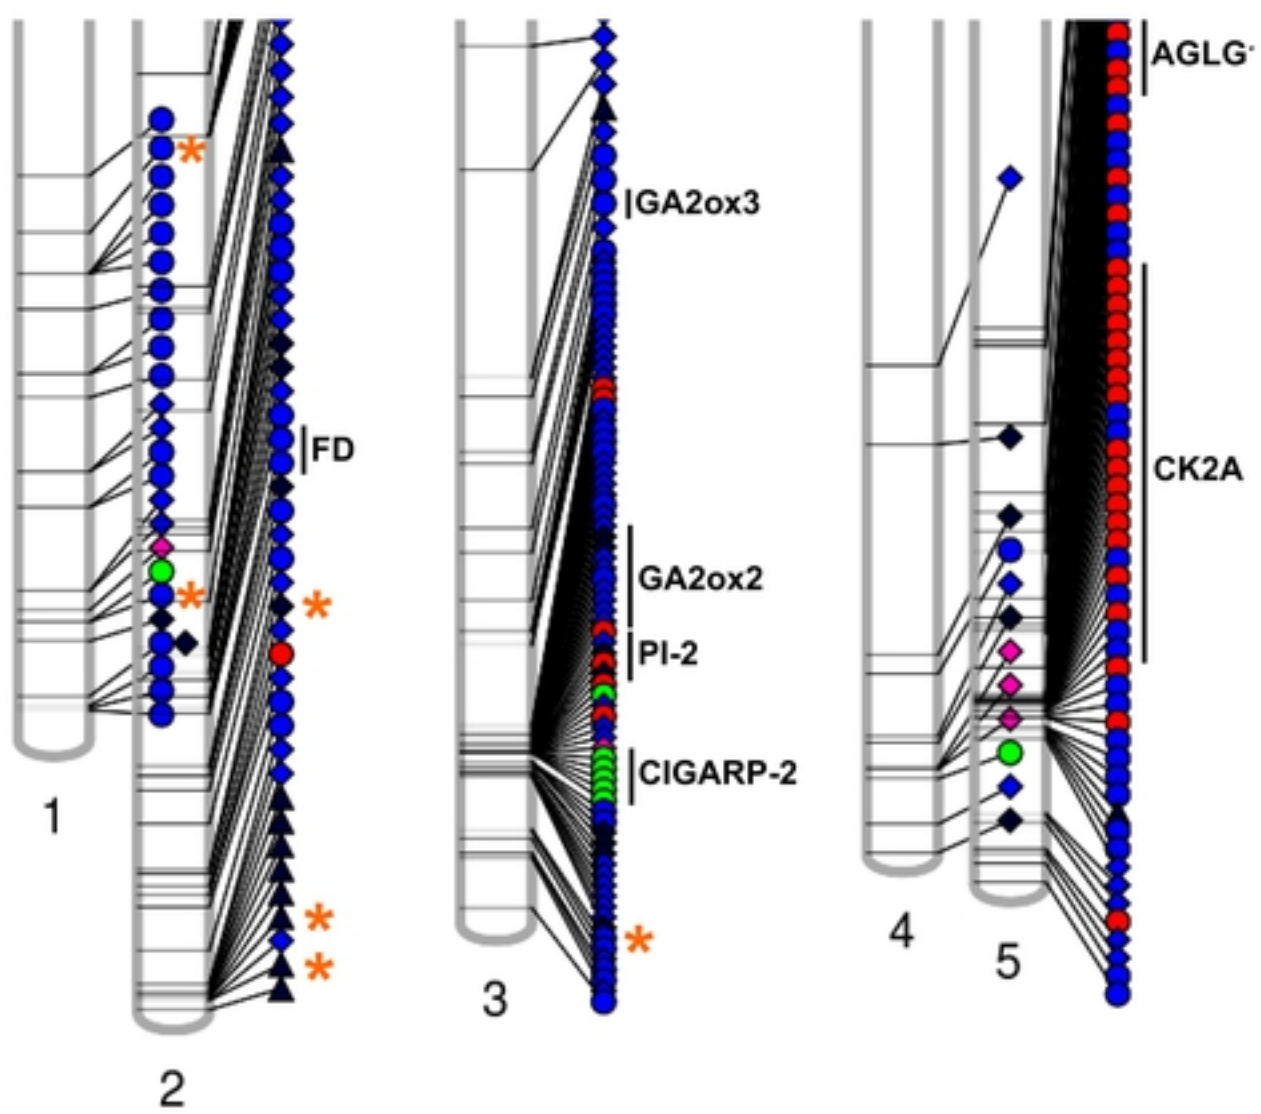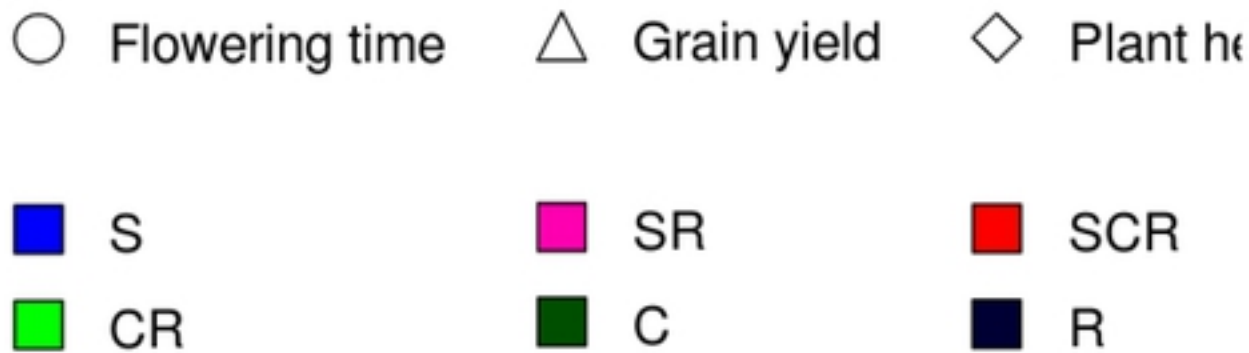

Figure 5
